# Supplementary material for: Characterization of cell lines derived from breast cancers and normal mammary tissues for the study of the intrinsic molecular subtypes
Source: Springer Nature journal article supplement (doi:10.1007/s10549-013-2743-3), 2013-10-26

## Supplementary Material for:

### Characterization of Cell Lines Derived from Breast Cancers and Normal Mammary Tissues for the Study of the Intrinsic Molecular Subtypes

Alex Prat, Olga Karginova, Joel S. Parker, Lisa Bixby, Cheng Fan, Xiaping He, Chuck J. Harrell, Erick Roman, Barbara Adamo, Melissa Troester and Charles M. Perou\*

\*To whom correspondence should be addressed. E-mail: [cperou@med.unc.edu](mailto:cperou@med.unc.edu)

#### This PDF file includes:

- **Table S1.** Clinical-pathological characteristics of cell lines grown in 2D.
- **Table S2.** Percentages of different antigenic phenotypes using EpCAM and CD49f in a panel of breast cell lines, hMSCs and hESCs.
- **Figure Legends**
- **Fig. S1.** Summary of the tumor and cell line data sets analyzed in this study.
- **Fig. S2.** Summary of the molecular subtyping approach of cell lines.
- **Fig. S3.** Mean gene expression correlation between identical cell lines from different data sets.
- **Fig. S4.** Identification of breast cancer cell line-specific genes.
- **Fig. S5.** Differentiation scores of the UNC337 data set after removal of the potential tumor stromal genes.
- **Fig. S6.** Correlation between the protein and gene expression of EpCAM and CD49f in the normal breast sorted subpopulations.
- **Fig. S7.** EpCAM/CD49f and CD24/CD44 FACS analyses and Keratin5/Keratin8 and Vimentin IF imaging for each cell line.
- **Fig. S8.** Dual keratin 5/keratin 8 and vimentin IF imaging of HCC38 sorted fractions.

## Figure Legends

**Figure S1.** Summary of the tumor and cell line data sets analyzed in this study. We used one breast sample data set (A) as published in Prat et al. which includes 320 tumor samples and 17 normal breast samples (UNC337, GSE18229). For cell lines, we used one UNC cell line data set (UNC31) that includes (B) UNC plated cell lines, (C) UNC sorted reduction mammaplasties and (D) UNC sorted SUM149PT, HCC1143 and HCC38 cell lines. As independent sets (INDCL) we used previously published cell line data sets of Neve et al., Hollestelle et al., and Kao et al. (E). Molecular subtyping was performed on the combined UNC337-UNC31-INDCL as described in materials and methods section and Figure S2. Throughout the manuscript, different sections of the combined set were used.

**Figure S2.** Summary of the molecular subtyping approach of cell lines.

**Figure S3.** Mean gene expression correlation between identical cell lines from different data sets. In red color, the 10 cell lines in common in all four data sets (BT474, BT549, HCC1937, MCF7, MDAMB231, MDAMB436, MDAMB468, SKBR3, SUM149PT and T47D).

**Figure S4.** Identification of breast cancer cell line-specific genes. (A) Statistically significant differentially expressed genes (up- and down-regulated) between BCCLs and their respective tumor subtype counterpart. On the right, overlap of the four down- and up-regulated cell line-specific gene lists. (B) Supervised hierarchical clustering of BCCLs and tumors using the overlap signatures identified in (A). The enrichment for gene ontology biological processes terms are shown below.

**Figure S5.** Differentiation scores of the UNC337 data set after removal of the potential tumor stromal genes identified in Figure S4 (downregulated cell line specific-genes).

**Figure S6.** Correlation between the protein and gene expression of EpCAM and CD49f in the normal breast sorted subpopulations. Cor=correlation.

**Figure S7.** EpCAM/CD49f and CD24/CD44 FACS analyses and Keratin5/Keratin8 and Vimentin IF imaging for each cell line.

**Figure S8.** Dual keratin 5/keratin 8 and vimentin IF imaging of HCC38 sorted fractions.

**Figure S9.** Dual keratin 5/keratin 8 and vimentin IF imaging of HCC1143 sorted fractions.

**Figure S10.** Dual keratin 5/keratin 8 and vimentin IF imaging of normal breast sorted fractions.

**Figure S11.** Dual keratin 5/keratin 8 and vimentin IF imaging of SUM149 sorted fractions.

**Figure S12.** Characterization of cell lines. Unsupervised hierarchical clustering of all cell lines and sorted fractions using the most variable genes (n=17,077). RMF, reduction mammaplasty fibroblasts; MSC, mesenchymal stem cells; hESC, human embryonic stem cells; HMEC, human mammary epithelial cells.



**Table S1.** Clinical-pathological characteristics of cell lines grown in 2D.

| Cell Line   | Molecular Subtype                     | ER status | HER2 status    | Patient Age | Ethnicity<br>(W=white; B=black; A=asian; WH=white hispanic) | Tumor type (IBC=inflammatory breast cancer; ANC=anaplastic carcinoma; DC=suctal carcinoma; IDC=invasive ductal carcinoma; AC=adenocarcinoma; pap=papillar; ILC=invasive lobular carcinoma; MC=metaplastic carcinoma) | Source<br>(M=Metastasis; P=primary; N=normal breast; F=fibrocystic disease) | Culture Media                       |
|-------------|---------------------------------------|-----------|----------------|-------------|-------------------------------------------------------------|----------------------------------------------------------------------------------------------------------------------------------------------------------------------------------------------------------------------|-----------------------------------------------------------------------------|-------------------------------------|
| BT20        | Basal-like                            | -         | -              | 74          | W                                                           | IDC                                                                                                                                                                                                                  | P                                                                           | DMEM+10%FBS                         |
| Cal51       | Basal-like                            | -         | -              | 45          | -                                                           | AC                                                                                                                                                                                                                   | M                                                                           | RPMI + 10%FBS                       |
| DU4475      | Basal-like                            | -         | -              | 70          | W                                                           | IDC                                                                                                                                                                                                                  | M                                                                           | RPMI + 10%FBS                       |
| HCC1008     | Basal-like                            | -         | +              | 67          | B                                                           | DC                                                                                                                                                                                                                   | M                                                                           | RPMI + 10%FBS                       |
| HCC1143     | Basal-like                            | -         | -              | 52          | W                                                           | DC                                                                                                                                                                                                                   | P                                                                           | RPMI + 10%FBS                       |
| HCC1187     | Basal-like                            | -         | -              | 41          | W                                                           | DC                                                                                                                                                                                                                   | P                                                                           | RPMI + 10%FBS                       |
| HCC1569     | Basal-like                            | -         | +              | 70          | B                                                           | MC                                                                                                                                                                                                                   | M                                                                           | RPMI + 10%FBS                       |
| HCC1599     | Basal-like                            | -         | -              | 44          | W                                                           | DC                                                                                                                                                                                                                   | P                                                                           | RPMI + 10%FBS                       |
| HCC2157     | Basal-like                            | -         | -              | 48          | B                                                           | DC                                                                                                                                                                                                                   | P                                                                           | RPMI + 10%FBS                       |
| HCC3153     | Basal-like                            | -         | -              | -           | -                                                           | -                                                                                                                                                                                                                    | P                                                                           | RPMI + 10%FBS                       |
| HCC70       | Basal-like                            | -         | -              | 49          | B                                                           | DC                                                                                                                                                                                                                   | P                                                                           | RPMI + 10%FBS                       |
| HMECB2      | Basal-like                            | -         | -              | -           | -                                                           | -                                                                                                                                                                                                                    | N                                                                           | HUMEC                               |
| HMECBL2     | Basal-like                            | -         | -              | -           | -                                                           | -                                                                                                                                                                                                                    | N                                                                           | HUMEC                               |
| HMECBW      | Basal-like                            | -         | -              | -           | -                                                           | -                                                                                                                                                                                                                    | N                                                                           | HUMEC                               |
| HMECBX      | Basal-like                            | -         | -              | -           | -                                                           | -                                                                                                                                                                                                                    | N                                                                           | HUMEC                               |
| HMLE        | Basal-like                            | -         | -              | -           | -                                                           | -                                                                                                                                                                                                                    | N                                                                           | HUMEC                               |
| MCF12A      | Basal-like                            | -         | -              | 60          | W                                                           | -                                                                                                                                                                                                                    | F                                                                           | DMEM/F12 + Supl                     |
| SUM229PE    | Basal-like                            | -         | -              | -           | -                                                           | AC                                                                                                                                                                                                                   | M                                                                           | HAM'S-F12 + 5%FBS+Supl              |
| SUM102PT    | Basal-like/Claudin-low <sup>1</sup>   | -         | -              | -           | -                                                           | IDC                                                                                                                                                                                                                  | M                                                                           | HUMEC                               |
| SUM149PT    | Basal-like/Claudin-low <sup>1</sup>   | -         | -              | -           | -                                                           | IBC <sup>1</sup>                                                                                                                                                                                                     | P                                                                           | HAM'S-F12 + 5%FBS+Supl <sup>3</sup> |
| HCC1937     | Basal-like/HER2-enriched <sup>1</sup> | -         | -              | 23          | W                                                           | IDC                                                                                                                                                                                                                  | P                                                                           | RPMI + 10%FBS                       |
| MDAMB468    | Basal-like/HER2-enriched <sup>1</sup> | -         | -              | 51          | B                                                           | AC                                                                                                                                                                                                                   | M                                                                           | Leibovitz's L-15+10%FBS             |
| 184A1       | Claudin-low                           | -         | -              | 21          | -                                                           | -                                                                                                                                                                                                                    | N                                                                           | MEBM + Suppl                        |
| BABE        | Claudin-low                           | -         | -              | -           | -                                                           | -                                                                                                                                                                                                                    | N                                                                           | HUMEC                               |
| BT549       | Claudin-low                           | -         | -              | 72          | W                                                           | IDC, pap                                                                                                                                                                                                             | P                                                                           | RPMI + 10%FBS                       |
| HBL100      | Claudin-low                           | -         | -              | 27          | -                                                           | -                                                                                                                                                                                                                    | N                                                                           | DMEM+10%FBS                         |
| HCC1395     | Claudin-low                           | -         | -              | 43          | W                                                           | IDC                                                                                                                                                                                                                  | P                                                                           | RPMI + 10%FBS                       |
| HCC38       | Claudin-low                           | -         | -              | 50          | W                                                           | DC                                                                                                                                                                                                                   | P                                                                           | RPMI + 10%FBS                       |
| HMECA1      | Claudin-low                           | -         | -              | -           | -                                                           | -                                                                                                                                                                                                                    | N                                                                           | HUMEC                               |
| HMLE_TWIST1 | Claudin-low                           | -         | -              | -           | -                                                           | -                                                                                                                                                                                                                    | N                                                                           | HUMEC                               |
| HMLE_SNAIL1 | Claudin-low                           | -         | -              | -           | -                                                           | -                                                                                                                                                                                                                    | N                                                                           | HUMEC                               |
| HS578T      | Claudin-low                           | -         | -              | 74          | W                                                           | MC                                                                                                                                                                                                                   | P                                                                           | DMEM+10%FBS                         |
| HTERT       | Claudin-low                           | -         | -              | -           | -                                                           | -                                                                                                                                                                                                                    | N                                                                           | RPMI + 10%FBS                       |
| MCF10A      | Claudin-low                           | -         | -              | 36          | W                                                           | -                                                                                                                                                                                                                    | F                                                                           | DMEM/F12 + Supl                     |
| MDAMB157    | Claudin-low                           | -         | -              | 44          | B                                                           | MDC                                                                                                                                                                                                                  | M                                                                           | DMEM+10%FBS                         |
| MDAMB231    | Claudin-low                           | -         | -              | 51          | W                                                           | AC                                                                                                                                                                                                                   | M                                                                           | DMEM+10%FBS                         |
| MDAMB435    | Claudin-low                           | -         | -              | 31          | W                                                           | IDC                                                                                                                                                                                                                  | M                                                                           | DMEM+10%FBS                         |
| MDAMB436    | Claudin-low                           | -         | -              | 43          | W                                                           | IDC                                                                                                                                                                                                                  | M                                                                           | Leibovitz's L-15+10%FBS             |
| ME16C       | Claudin-low                           | -         | -              | -           | -                                                           | -                                                                                                                                                                                                                    | N                                                                           | HUMEC                               |
| HMF1        | Claudin-low                           | -         | -              | -           | -                                                           | -                                                                                                                                                                                                                    | N                                                                           | DMEM/F12 + 10%FBS                   |
| HMF2        | Claudin-low                           | -         | -              | -           | -                                                           | -                                                                                                                                                                                                                    | N                                                                           | DMEM/F12 + 10%FBS                   |
| HMF3        | Claudin-low                           | -         | -              | -           | -                                                           | -                                                                                                                                                                                                                    | N                                                                           | DMEM/F12 + 10%FBS                   |
| HMF1714     | Claudin-low                           | -         | -              | -           | -                                                           | -                                                                                                                                                                                                                    | N                                                                           | -                                   |
| HMF1299     | Claudin-low                           | -         | -              | -           | -                                                           | -                                                                                                                                                                                                                    | N                                                                           | -                                   |
| HMF1632     | Claudin-low                           | -         | -              | -           | -                                                           | -                                                                                                                                                                                                                    | N                                                                           | -                                   |
| HMF1394     | Claudin-low                           | -         | -              | -           | -                                                           | -                                                                                                                                                                                                                    | N                                                                           | -                                   |
| SKBR7       | Claudin-low                           | -         | -              | -           | -                                                           | -                                                                                                                                                                                                                    | M                                                                           | RPMI + 10%FBS                       |
| SUM1315     | Claudin-low                           | -         | -              | -           | -                                                           | IDC                                                                                                                                                                                                                  | M                                                                           | HAM'S-F12 + 5%FBS+Supl <sup>2</sup> |
| SUM159PT    | Claudin-low                           | -         | -              | -           | -                                                           | ANC                                                                                                                                                                                                                  | P                                                                           | HAM'S-F12 + 5%FBS+Supl <sup>3</sup> |
| AU565       | HER2-enriched                         | -         | +              | 43          | W                                                           | AC                                                                                                                                                                                                                   | M                                                                           | RPMI + 10%FBS                       |
| HCC1954     | HER2-enriched                         | -         | +              | 61          | A                                                           | DC                                                                                                                                                                                                                   | P                                                                           | RPMI + 10%FBS                       |
| HCC202      | HER2-enriched                         | -         | +              | 82          | W                                                           | DC                                                                                                                                                                                                                   | P                                                                           | RPMI + 10%FBS                       |
| HCC2185     | HER2-enriched                         | -         | -              | 49          | WH                                                          | LC                                                                                                                                                                                                                   | M                                                                           | RPMI + 10%FBS                       |
| HCC2218     | HER2-enriched                         | -         | +              | 38          | W                                                           | IDC                                                                                                                                                                                                                  | P                                                                           | RPMI + 10%FBS                       |
| HCC2688     | HER2-enriched                         | -         | -              | -           | -                                                           | -                                                                                                                                                                                                                    | P                                                                           | RPMI + 10%FBS                       |
| SKBR3       | HER2-enriched                         | -         | +              | 43          | W                                                           | AC                                                                                                                                                                                                                   | M                                                                           | RPMI + 10%FBS                       |
| SKBR5       | HER2-enriched                         | -         | +              | -           | -                                                           | -                                                                                                                                                                                                                    | M                                                                           | HAM'S-F12 + 10%FBS                  |
| SUM190PT    | HER2-enriched                         | -         | +              | -           | -                                                           | IBC                                                                                                                                                                                                                  | P                                                                           | HAM'S-F12 + 5%FBS+Supl <sup>3</sup> |
| SUM225CWN   | HER2-enriched                         | -         | +              | -           | -                                                           | IDC                                                                                                                                                                                                                  | M                                                                           | HAM'S-F12 + 5%FBS+Supl <sup>3</sup> |
| UACC893     | HER2-enriched                         | -         | +              | 57          | W                                                           | IDC                                                                                                                                                                                                                  | P                                                                           | RPMI + 10%FBS                       |
| BT474       | HER2-enriched/Luminal B <sup>1</sup>  | +         | +              | 60          | W                                                           | IDC                                                                                                                                                                                                                  | P                                                                           | RPMI + 10%FBS                       |
| 600MPE      | Luminal B                             | +         | -              | -           | -                                                           | IDC                                                                                                                                                                                                                  | M                                                                           | DMEM+10%FBS                         |
| BT483       | Luminal B                             | +         | -              | 23          | W                                                           | IDC, pap                                                                                                                                                                                                             | P                                                                           | RPMI + 10%FBS                       |
| CAMA1       | Luminal B                             | +         | -              | 51          | W                                                           | AC                                                                                                                                                                                                                   | M                                                                           | DMEM+10%FBS                         |
| EVSAT       | Luminal B                             | -         | -              | -           | -                                                           | -                                                                                                                                                                                                                    | M                                                                           | RPMI + 10%FBS                       |
| HCC1007     | Luminal B                             | +         | + <sup>5</sup> | 67          | B                                                           | DC                                                                                                                                                                                                                   | P                                                                           | RPMI + 10%FBS                       |
| HCC1419     | Luminal B                             | -         | +              | 42          | W                                                           | IDC                                                                                                                                                                                                                  | P                                                                           | RPMI + 10%FBS                       |
| HCC1428     | Luminal B                             | +         | -              | 49          | W                                                           | AC                                                                                                                                                                                                                   | M                                                                           | RPMI + 10%FBS                       |
| HCC712      | Luminal B                             | +         | -              | -           | -                                                           | -                                                                                                                                                                                                                    | P                                                                           | RPMI + 10%FBS                       |
| LY2         | Luminal B                             | +         | -              | 69          | W                                                           | IDC                                                                                                                                                                                                                  | M                                                                           | DMEM+10%FBS                         |
| MCF7        | Luminal B                             | +         | -              | 69          | W                                                           | IDC                                                                                                                                                                                                                  | M                                                                           | RPMI + 10%FBS                       |
| MDAMB134    | Luminal B                             | +         | -              | 47          | W                                                           | IDC                                                                                                                                                                                                                  | M                                                                           | DMEM+10%FBS                         |
| MDAMB175    | Luminal B                             | +         | -              | 56          | B                                                           | IDC                                                                                                                                                                                                                  | M                                                                           | DMEM+10%FBS                         |
| MDAMB330    | Luminal B                             | +         | +              | 43          | W                                                           | -                                                                                                                                                                                                                    | M                                                                           | Leibovitz's L-15+20%FBS             |
| MDAMB361    | Luminal B                             | +         | +              | 40          | W                                                           | AC                                                                                                                                                                                                                   | p                                                                           | Leibovitz's L-15+20%FBS             |
| MDAMB415    | Luminal B                             | +         | -              | 38          | W                                                           | AC                                                                                                                                                                                                                   | M                                                                           | DMEM+10%FBS                         |
| MDAMB453    | Luminal B                             | -         | -              | 48          | W                                                           | AC                                                                                                                                                                                                                   | M                                                                           | DMEM+10%FBS                         |
| OCUBF       | Luminal B                             | -         | +              | 53          | A                                                           | -                                                                                                                                                                                                                    | M                                                                           | DMEM+10%FBS+0.5mM SP <sup>4</sup>   |
| SUM185PE    | Luminal B                             | -         | -              | -           | -                                                           | DC                                                                                                                                                                                                                   | M                                                                           | HAM'S-F12 + 5%FBS+Supl <sup>3</sup> |
| SUM44PE     | Luminal B                             | +         | -              | -           | -                                                           | AC                                                                                                                                                                                                                   | M                                                                           | HAM'S-F12 + 5%FBS+Supl <sup>3</sup> |
| SUM52PE     | Luminal B                             | +         | -              | -           | -                                                           | AC                                                                                                                                                                                                                   | M                                                                           | HAM'S-F12 + 5%FBS+Supl <sup>3</sup> |
| T47D        | Luminal B                             | +         | -              | 54          | -                                                           | IDC                                                                                                                                                                                                                  | M                                                                           | RPMI + 10%FBS                       |
| ZR751       | Luminal B                             | +         | -              | 63          | W                                                           | IDC                                                                                                                                                                                                                  | M                                                                           | RPMI + 10%FBS                       |
| ZR7530      | Luminal B                             | +         | +              | 47          | B                                                           | IDC                                                                                                                                                                                                                  | M                                                                           | RPMI + 10%FBS                       |
| ZR75B       | Luminal B                             | +         | -              | -           | -                                                           | -                                                                                                                                                                                                                    | M                                                                           | RPMI + 10%FBS                       |
| HCC1500     | Luminal B/Basal-like <sup>1</sup>     | +         | -              | 23          | B                                                           | IDC                                                                                                                                                                                                                  | P                                                                           | RPMI + 10%FBS                       |
| UACC812     | Luminal B/HER2-enriched <sup>1</sup>  | +         | +              | 43          | -                                                           | IDC                                                                                                                                                                                                                  | P                                                                           | RPMI + 10%FBS                       |

\*1, Cell lines whose molecular subtype differed in at least one of the data sets evaluated (see Supplemental Material). \*2, Insulin and epidermal growth factor; \*3, Insulin and hydrocortisone; \*4, sodium pyruvate; \*5, This cell line has been identified as HER2+ in Kao et al., and HER2- in Neve et al.

**Table S2.** Percentages of different antigenic phenotypes using EpCAM and CD49f in a panel fo breast-derived cell lines, hMSC and hESC.

|                      | EpCAM-<br>CD49f-<br>Stromal | EpCAM-/low<br>CD49f+<br>Stromal/MaSC | EpCAM-/low<br>CD49fhigh<br>MaSC | EpCAMhigh<br>CD49f+<br>pL | EpCAMhigh<br>CD49f-/low<br>mL |
|----------------------|-----------------------------|--------------------------------------|---------------------------------|---------------------------|-------------------------------|
| <b>Basal-like</b>    |                             |                                      |                                 |                           |                               |
| HCC1143*             |                             |                                      | 40%                             | 60%                       |                               |
| HCC1187              |                             |                                      |                                 |                           | 96%                           |
| HCC1937              |                             |                                      |                                 | 99%                       |                               |
| MDAMB468             |                             |                                      |                                 | 100%                      |                               |
| SUM149PT*            |                             | 10%                                  |                                 |                           | 85%                           |
| <b>HER2-enriched</b> |                             |                                      |                                 |                           |                               |
| BT474                | 3%                          |                                      |                                 |                           | 91%                           |
| SKBR3                | 2%                          |                                      |                                 |                           | 97%                           |
| <b>Luminal B</b>     |                             |                                      |                                 |                           |                               |
| HCC1428              | 3%                          |                                      |                                 |                           | 98%                           |
| MCF7                 | 6%                          |                                      |                                 |                           | 94%                           |
| T47D                 |                             |                                      |                                 | 98%                       |                               |
| ZR751                |                             |                                      |                                 | 98%                       |                               |
| HCC1500              |                             |                                      |                                 | 99%                       |                               |
| <b>Claudin-low</b>   |                             |                                      |                                 |                           |                               |
| BT549                |                             |                                      | 92%                             |                           |                               |
| SUM102PT             |                             |                                      | 97%                             |                           |                               |
| SUM1315              |                             |                                      | 97%                             |                           |                               |
| MDAMB231             |                             |                                      | 97%                             |                           |                               |
| MDA-MB436            |                             |                                      | 97%                             |                           |                               |
| HCC1395              |                             |                                      | 98%                             |                           |                               |
| SUM159PT             |                             |                                      | 98%                             |                           |                               |
| HS578T               |                             | 97%                                  |                                 |                           |                               |
| HCC38*               |                             |                                      | 79%                             | 18%                       |                               |
| <b>HMEC</b>          |                             |                                      |                                 |                           |                               |
| BABE                 |                             |                                      | 100%                            |                           |                               |
| HMECBL               |                             |                                      | 95%                             |                           |                               |
| HMECBW               |                             |                                      | 97%                             |                           |                               |
| HMECBX               |                             |                                      | 98%                             |                           |                               |
| HMLE                 |                             |                                      | 98%                             |                           |                               |
| ME16C                |                             |                                      | 98%                             |                           |                               |
| <b>HMF</b>           |                             |                                      |                                 |                           |                               |
| HMF1                 |                             | 98%                                  |                                 |                           |                               |
| <b>hMSC</b>          |                             |                                      |                                 |                           |                               |
| hMSC#1               |                             | 98%                                  |                                 |                           |                               |
| hMSC#2               |                             | 98%                                  |                                 |                           |                               |
| hMSC#3               |                             | 98%                                  |                                 |                           |                               |
| <b>hESC</b>          |                             |                                      |                                 |                           |                               |
| hESC H9              |                             |                                      |                                 | 98%                       |                               |
| hESC H7              |                             |                                      |                                 | 98%                       |                               |

\*, Cell lines with two clear distinct subpopulations.

# Supplemental Figure 1

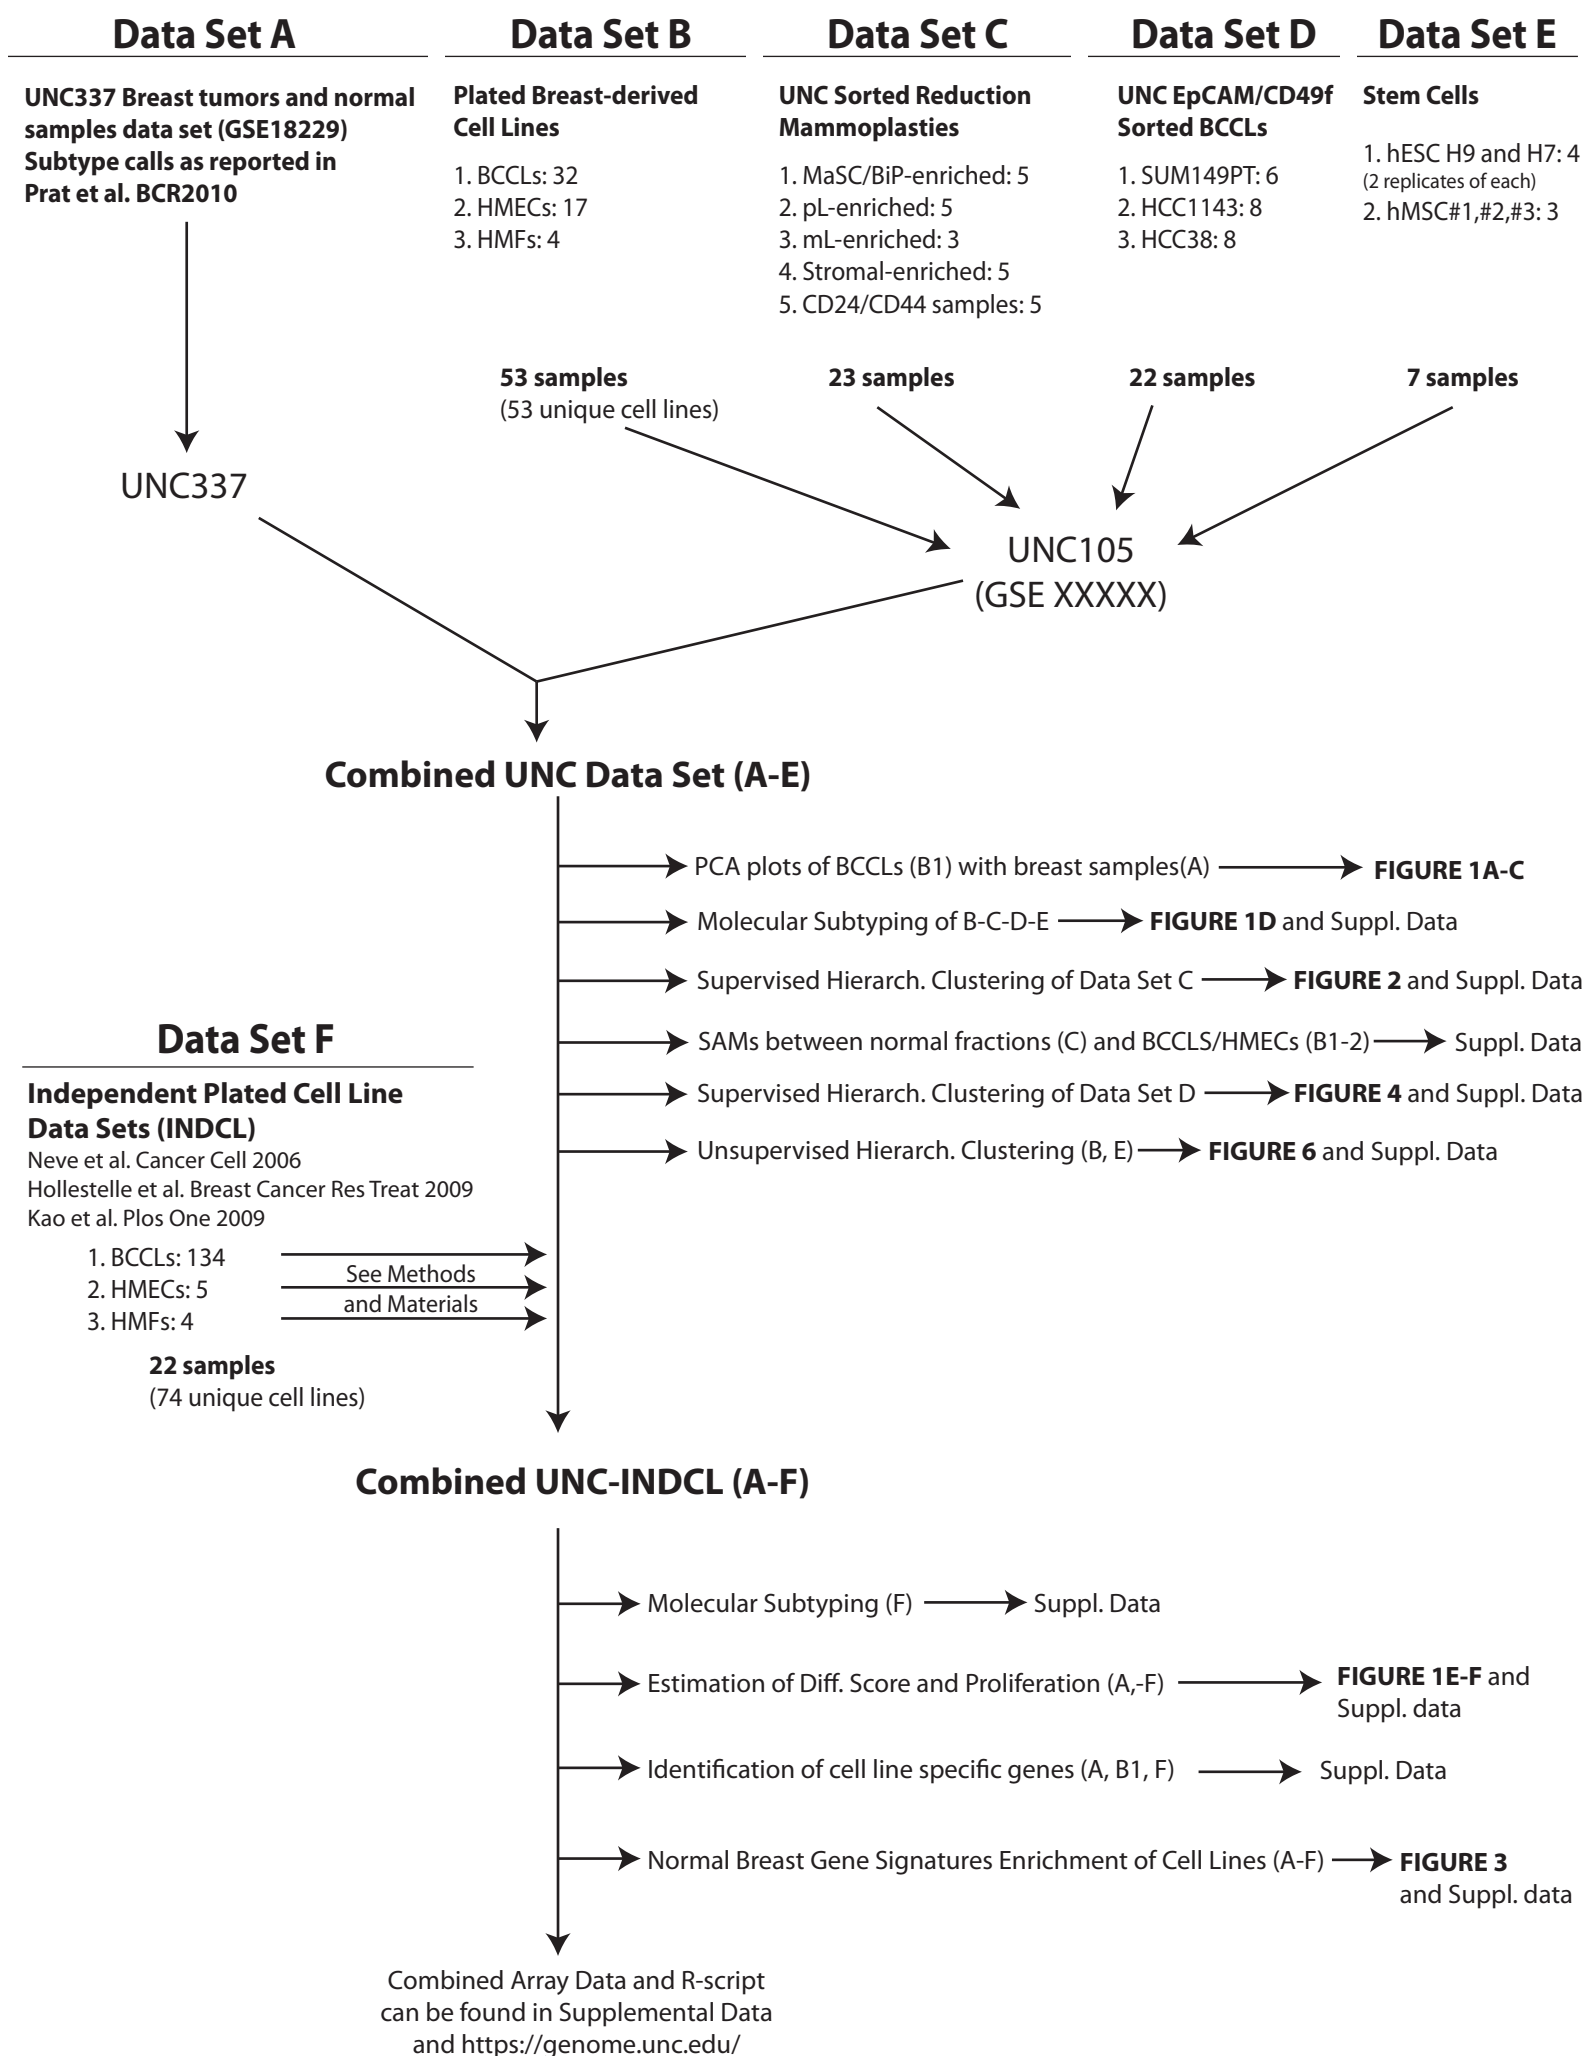

# Supplemental Figure 2

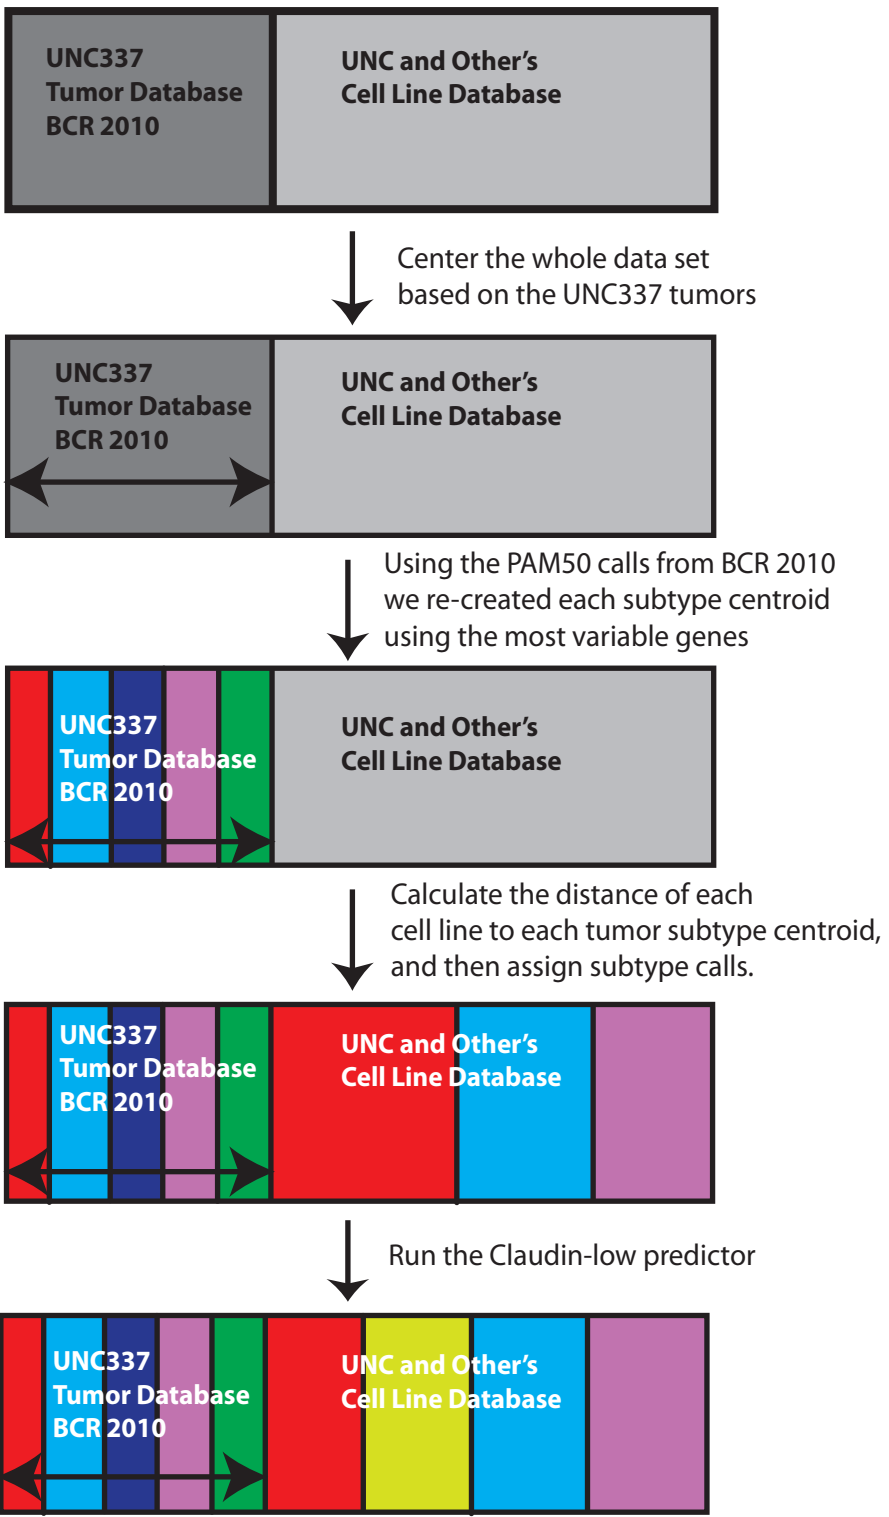

# Supplemental Figure 3

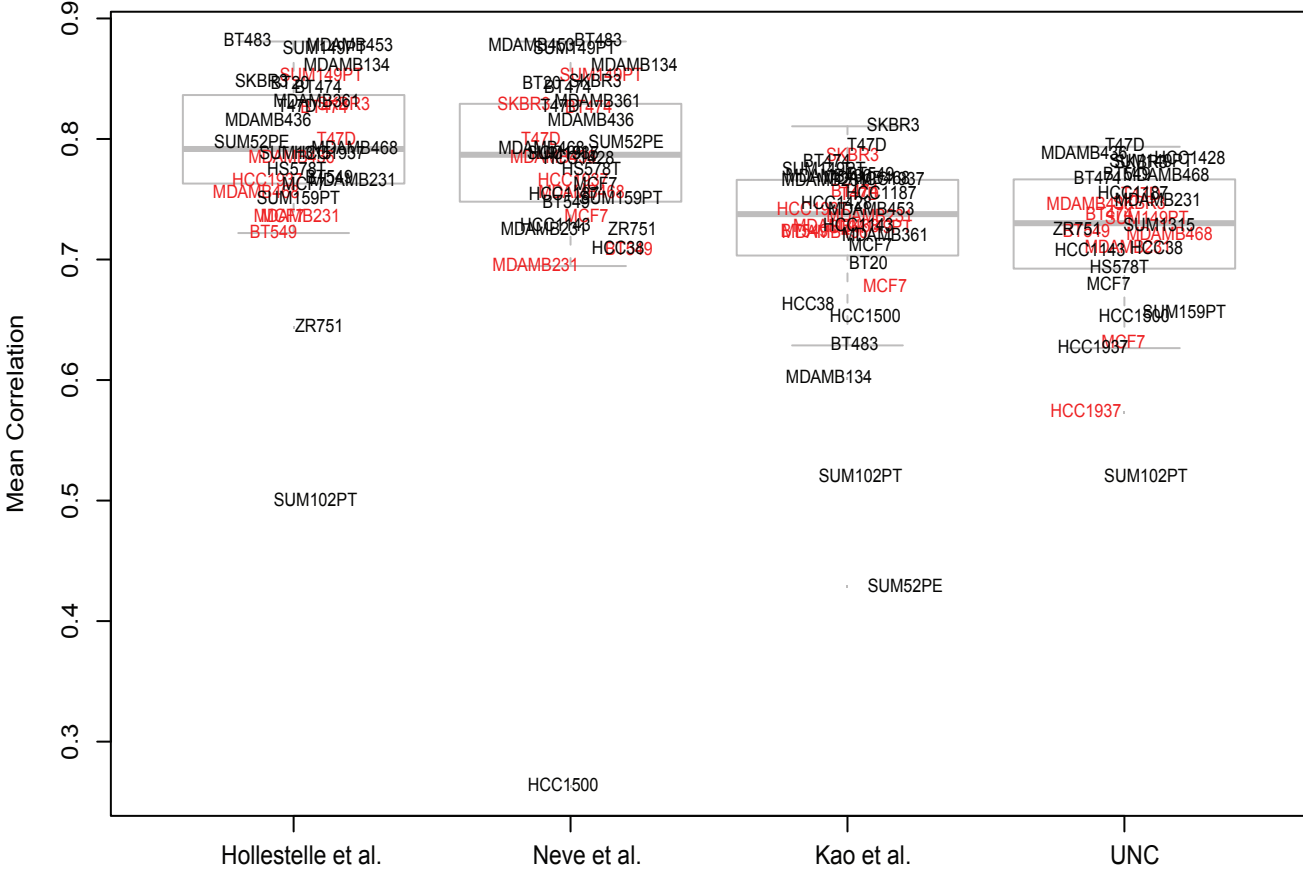

# Supplemental Figure 4

A

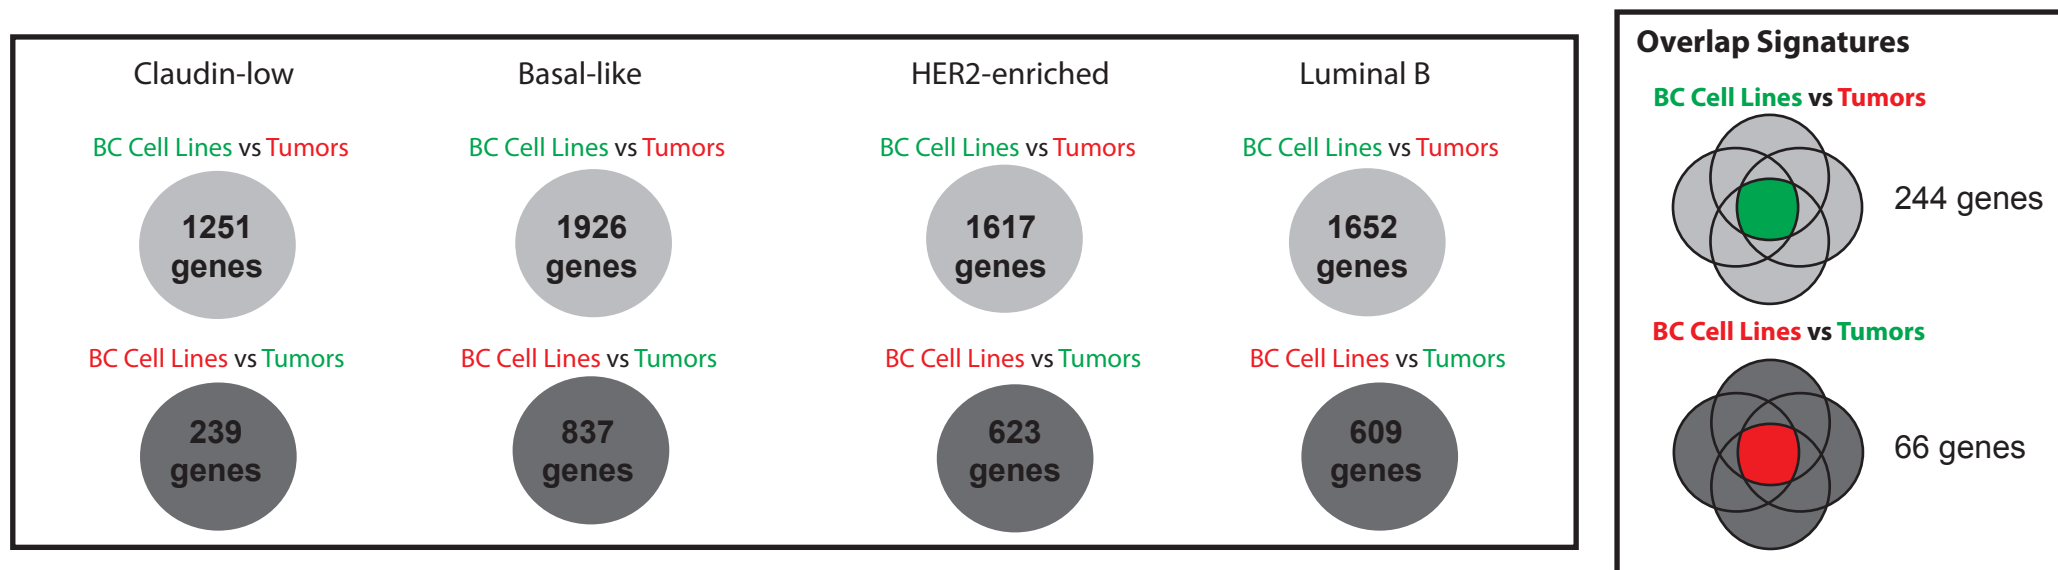

B

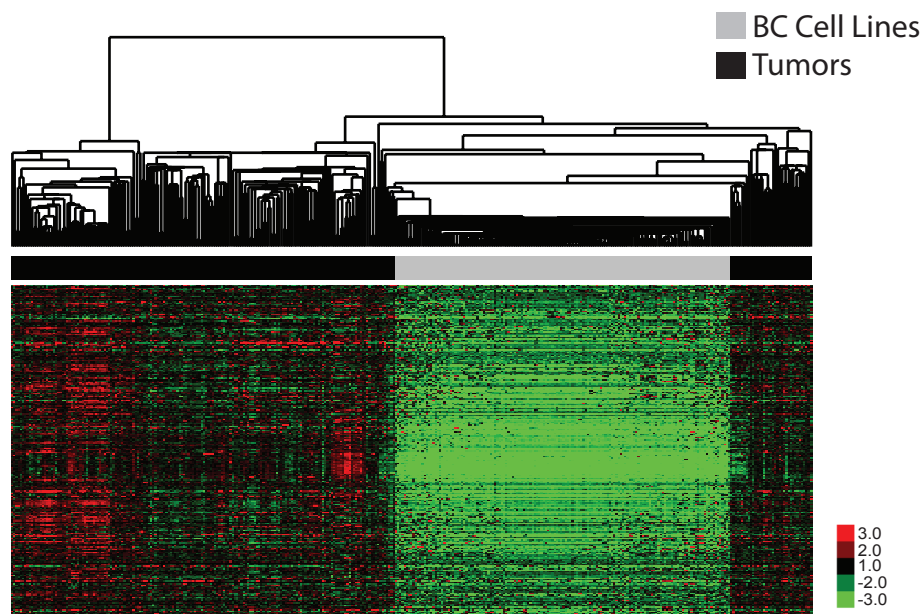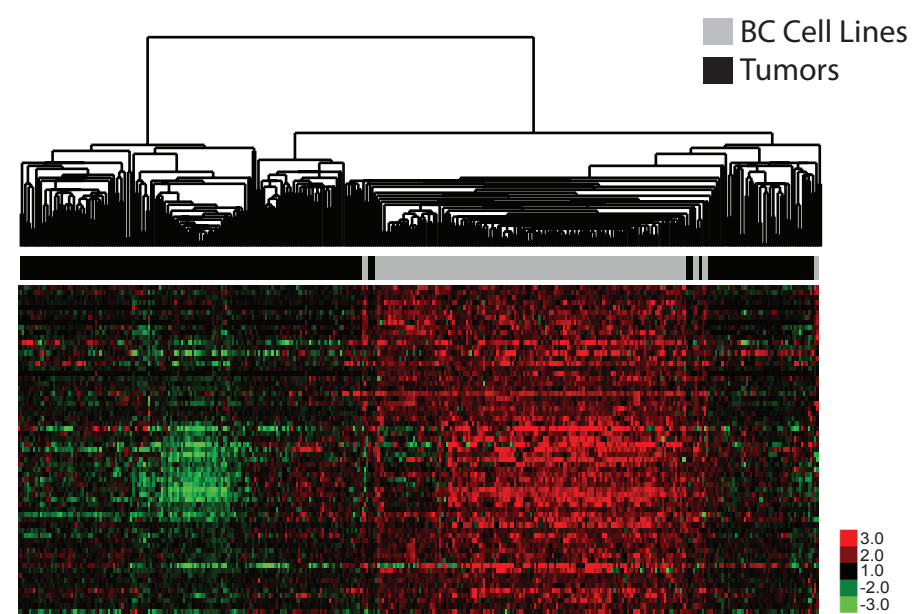

**Table.** GO Biological Processes Enriched in the Downregulated Cell Lines Gene List

| Term                                            | Count | %  | PValue   |
|-------------------------------------------------|-------|----|----------|
| GO:0009611~response to wounding                 | 34    | 14 | 3.21E-12 |
| GO:0009605~response to external stimulus        | 43    | 18 | 5.37E-11 |
| GO:0006950~response to stress                   | 54    | 22 | 9.46E-08 |
| GO:0006954~inflammatory response                | 21    | 9  | 9.78E-08 |
| GO:0048583~regulation of response to stimulus   | 25    | 10 | 1.35E-07 |
| GO:0065008~regulation of biological quality     | 49    | 20 | 1.47E-07 |
| GO:0048856~anatomical structure development     | 70    | 29 | 1.60E-07 |
| GO:0032502~developmental process                | 81    | 33 | 2.21E-07 |
| GO:0042221~response to chemical stimulus        | 44    | 18 | 3.70E-07 |
| GO:0007275~multicellular organismal development | 75    | 31 | 4.40E-07 |
| GO:0048731~system development                   | 65    | 27 | 4.54E-07 |
| GO:0006952~defense response                     | 28    | 11 | 5.48E-07 |
| GO:0002682~regulation of immune system process  | 21    | 9  | 1.44E-06 |
| GO:0048513~organ development                    | 52    | 21 | 1.50E-06 |
| GO:0050776~regulation of immune response        | 16    | 7  | 1.63E-06 |

**Table.** GO Biological Processes Enriched in the Upregulated Cell Lines Gene List

| Term                                                         | Count | %  | PValue   |
|--------------------------------------------------------------|-------|----|----------|
| GO:0019222~regulation of metabolic process                   | 24    | 36 | 1.45E-03 |
| GO:0031323~regulation of cellular metabolic process          | 23    | 35 | 2.00E-03 |
| GO:0080090~regulation of primary metabolic process           | 22    | 33 | 2.56E-03 |
| GO:0060255~regulation of macromolecule metabolic process     | 21    | 32 | 5.53E-03 |
| GO:0045449~regulation of transcription                       | 18    | 27 | 6.29E-03 |
| GO:0010556~regulation of macromolecule biosynthetic process  | 19    | 29 | 6.34E-03 |
| GO:0010468~regulation of gene expression                     | 19    | 29 | 6.99E-03 |
| GO:0031326~regulation of cellular biosynthetic process       | 19    | 29 | 9.75E-03 |
| GO:0009889~regulation of biosynthetic process                | 19    | 29 | 1.04E-02 |
| GO:0019219~regulation of nucleobase, nucleoside, nucleotide  | 18    | 27 | 1.38E-02 |
| GO:0051171~regulation of nitrogen compound metabolic process | 18    | 27 | 1.51E-02 |
| GO:0009987~cellular process                                  | 45    | 68 | 1.70E-02 |
| GO:0051049~regulation of transport                           | 6     | 9  | 1.84E-02 |

**Supplemental Figure 5**

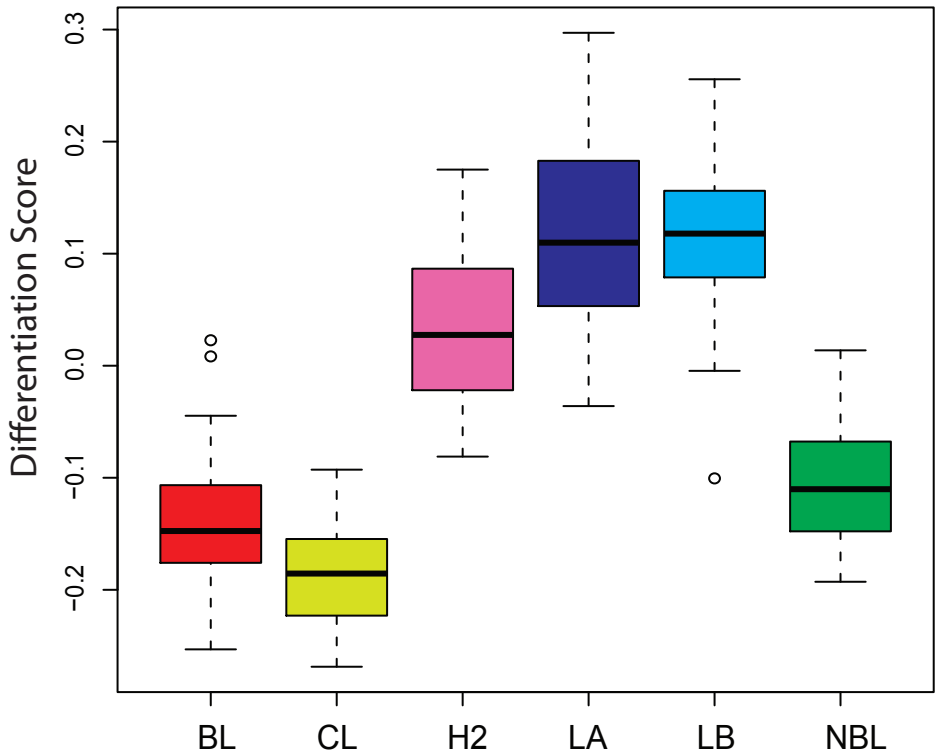

**Supplemental Figure 6**

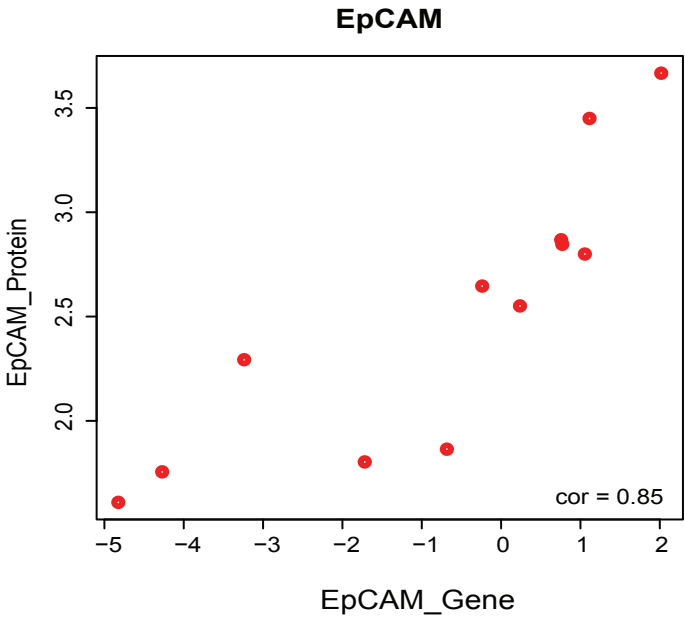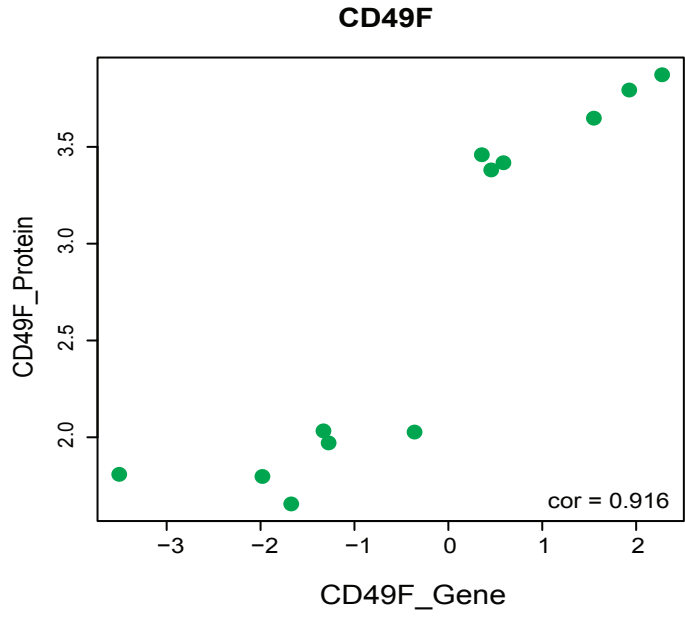



# Supplemental Figure 7

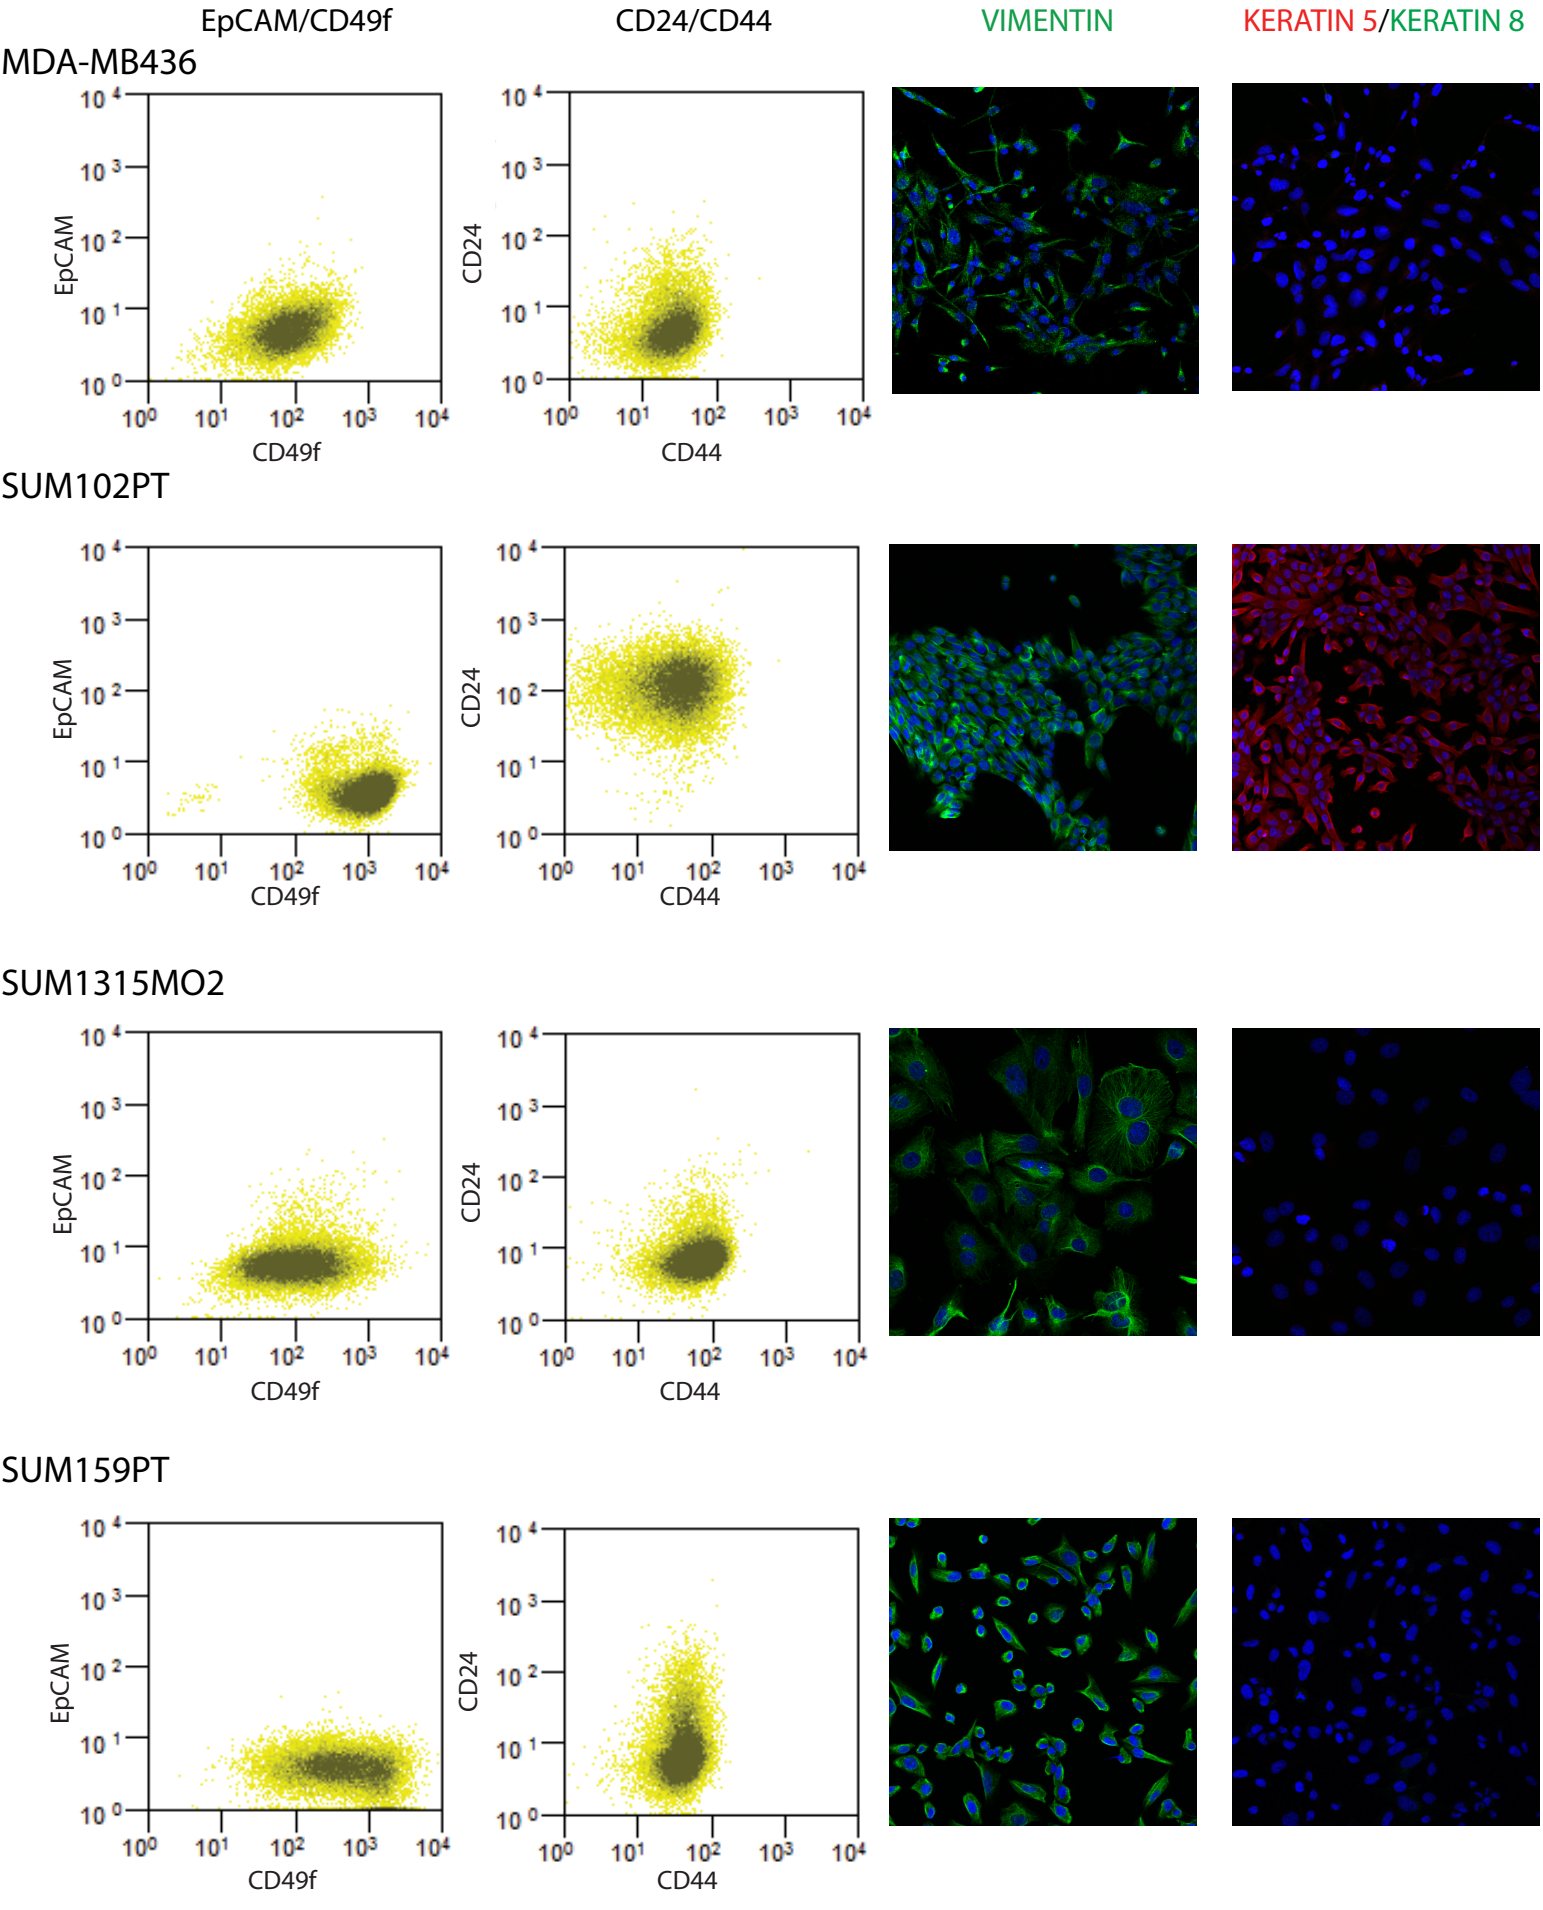



EpCAM/CD49f

CD24/CD44

VIMENTIN

KERATIN 5/KERATIN 8

BT549

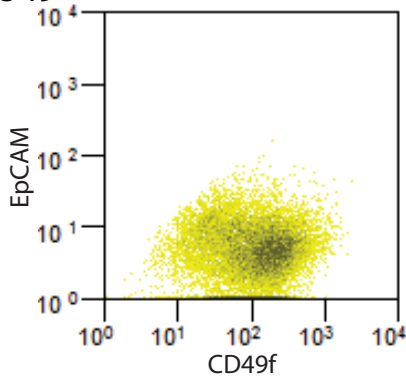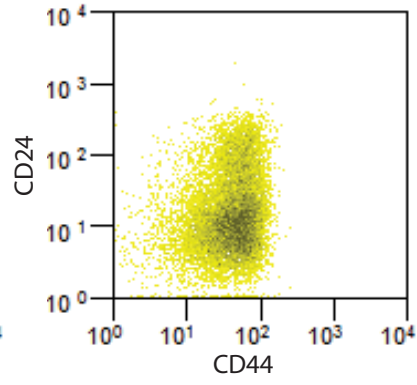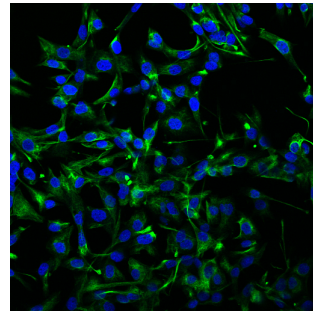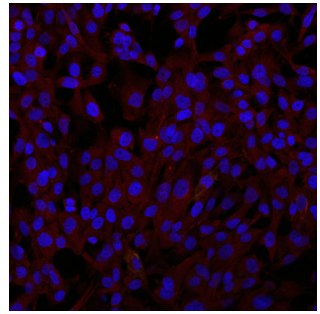

Hs578T

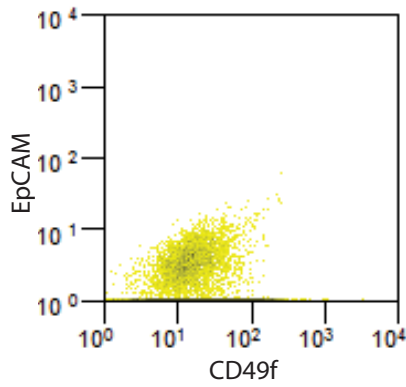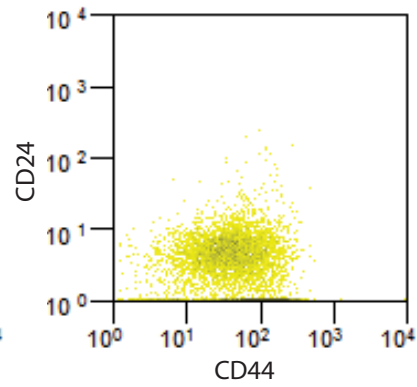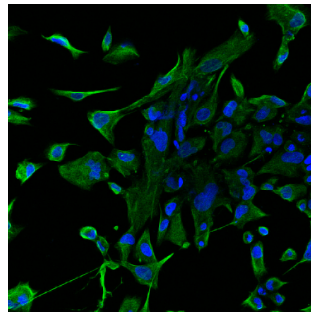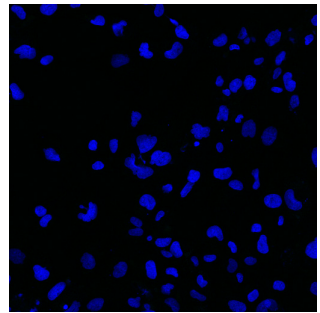

HCC38

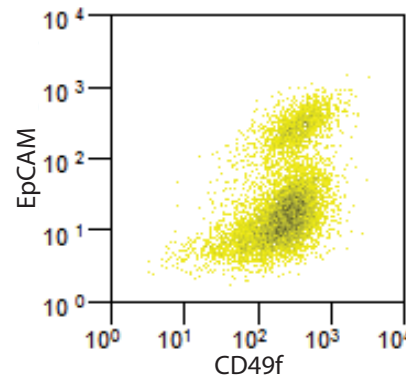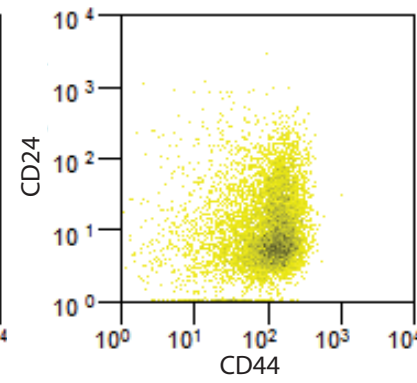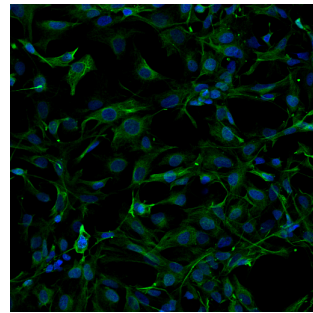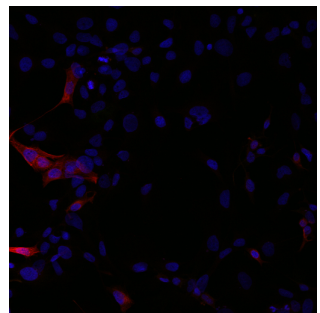

MDA-MB231

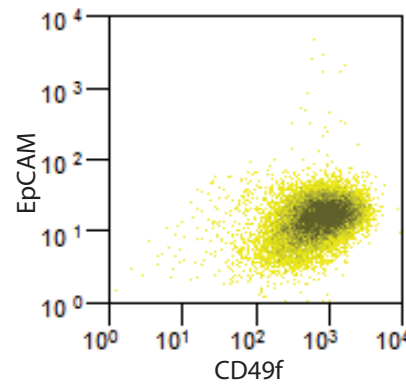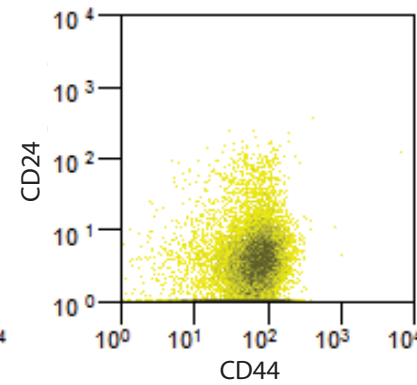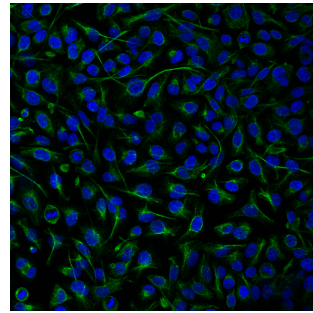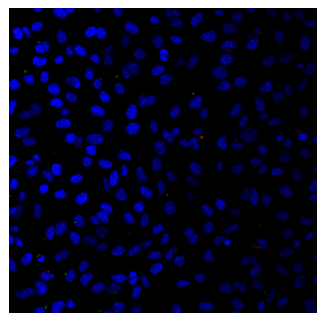

EpCAM/CD49f

CD24/CD44

VIMENTIN

KERATIN 5/KERATIN 8

HCC1395

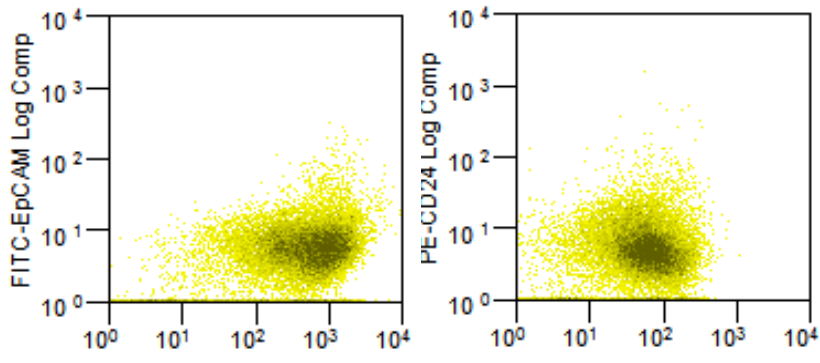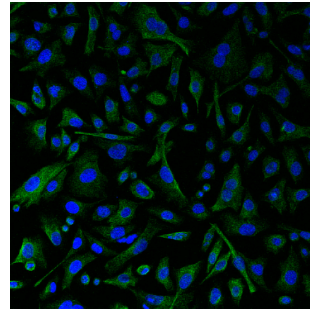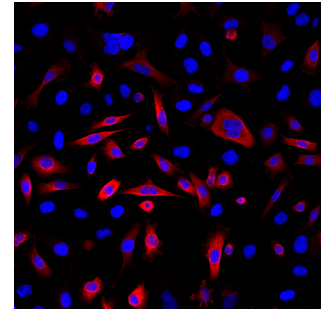

EpCAM/CD49f

CD24/CD44

VIMENTIN

KERATIN 5/KERATIN 8

HCC1143

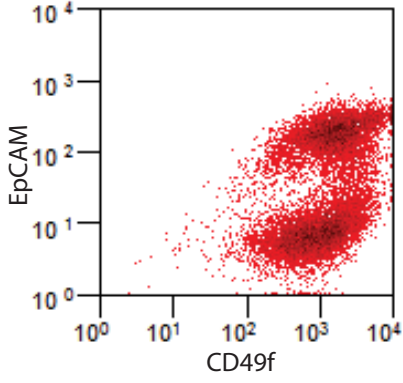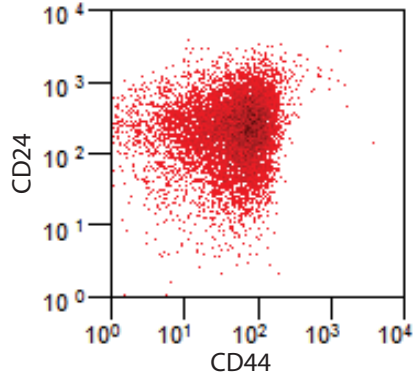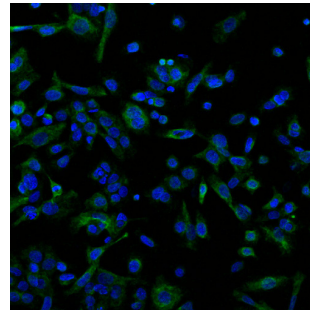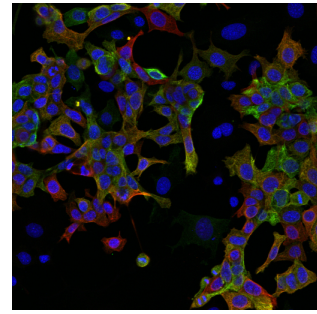

HCC1187

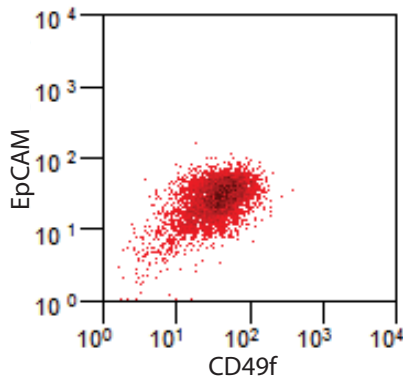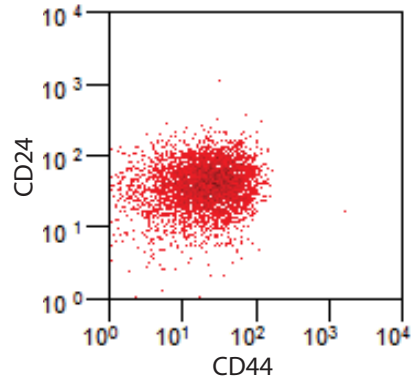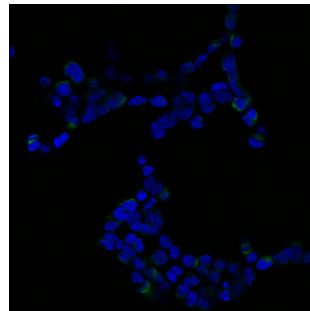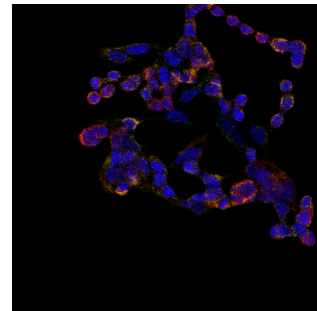

HCC1937

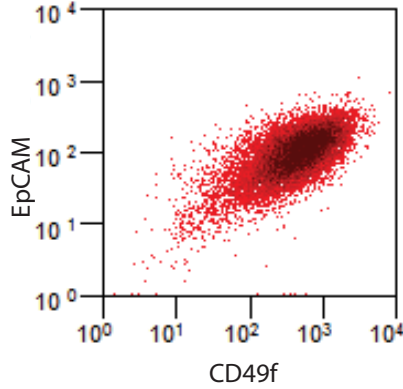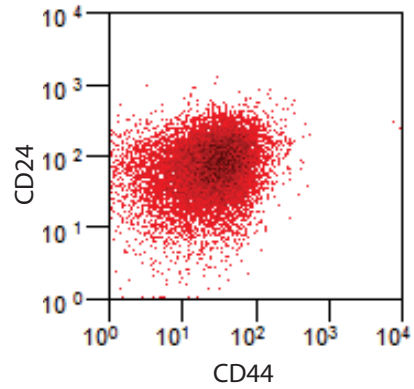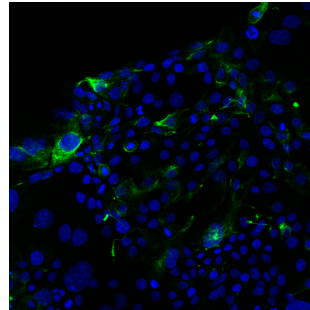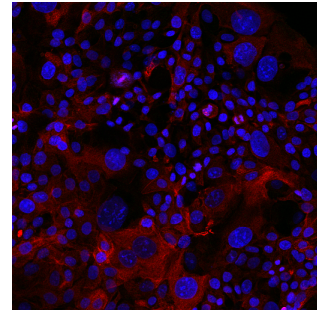

MDA-MB468

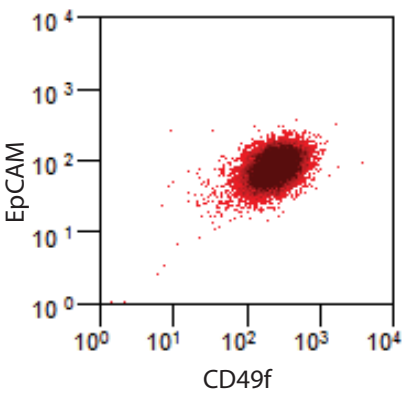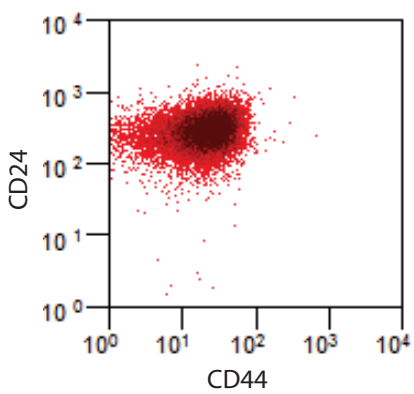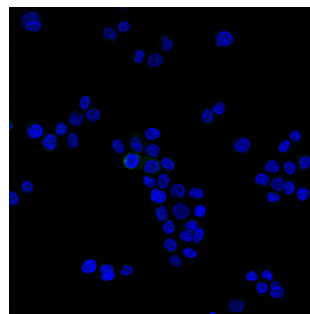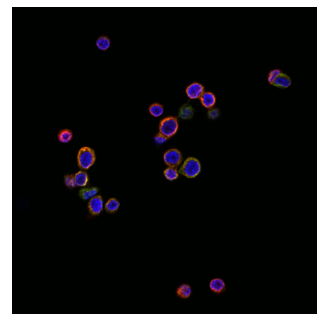

EpCAM/CD49f

CD24/CD44

VIMENTIN

KERATIN 5/KERATIN 8

SUM149PT

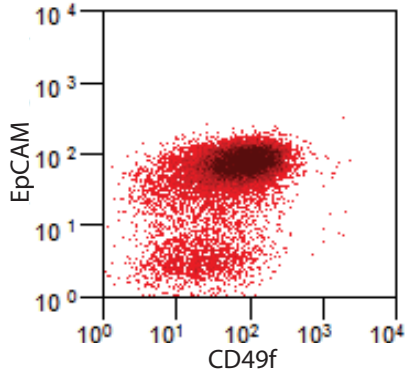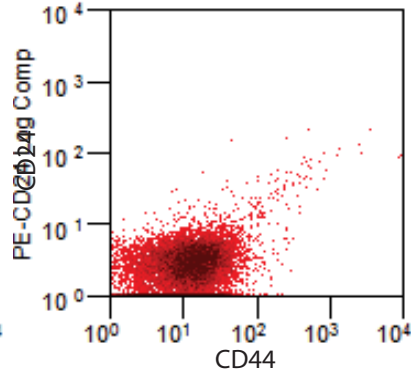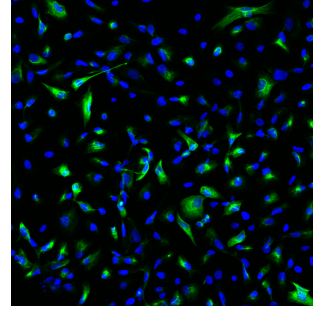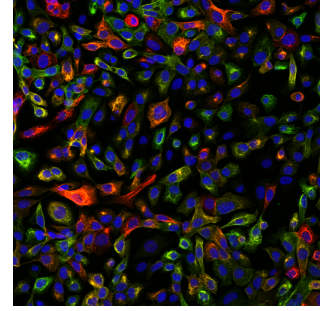



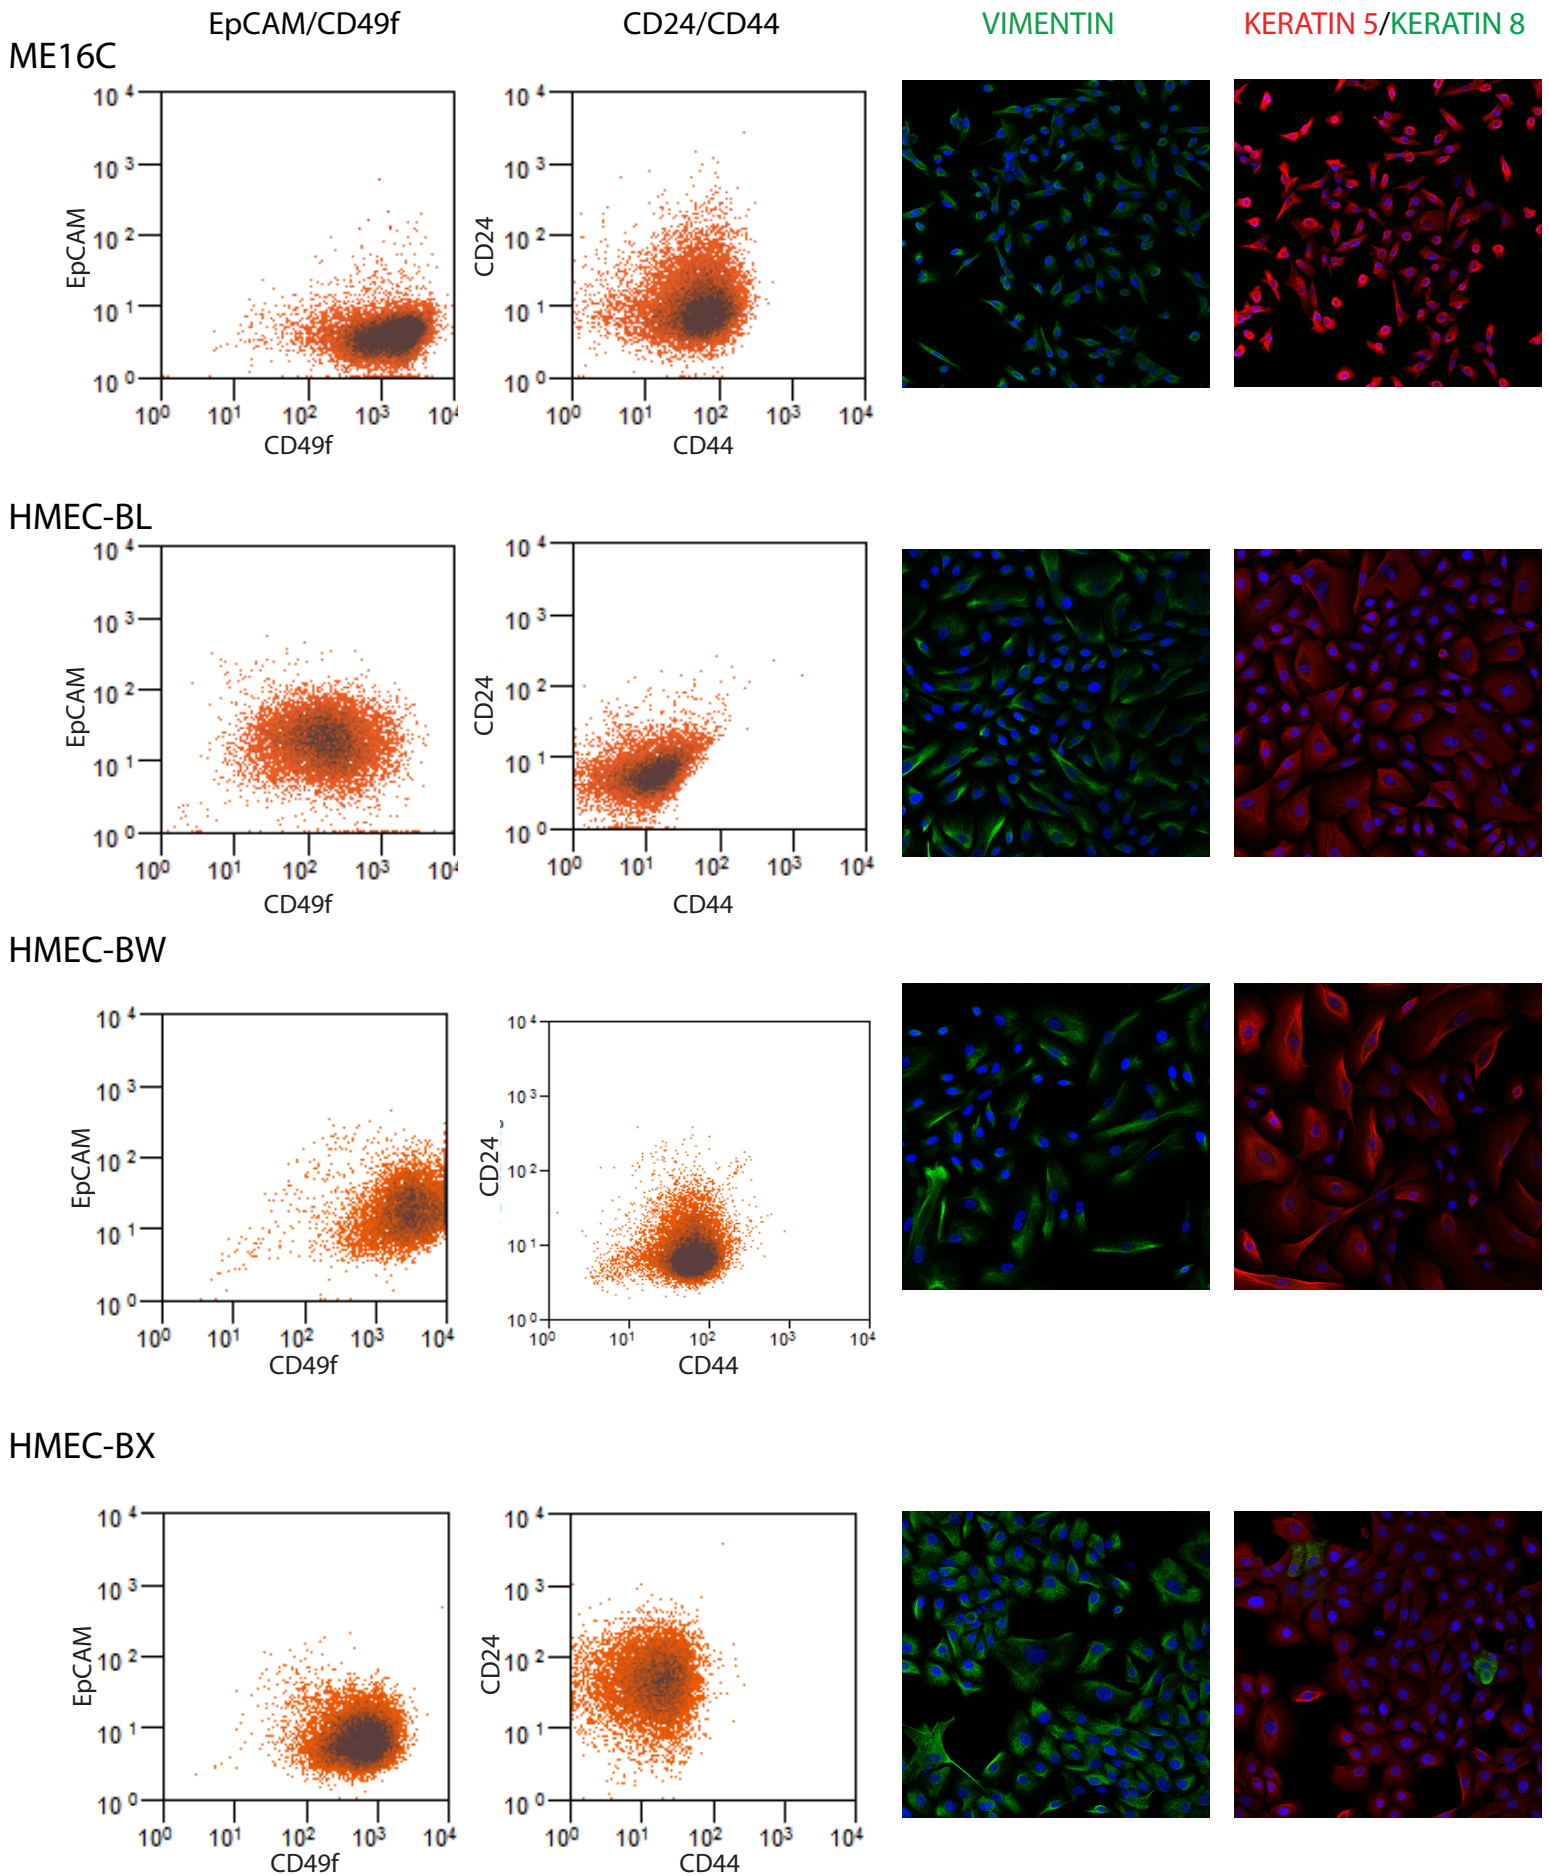

EpCAM/CD49f

CD24/CD44

VIMENTIN

KERATIN 5/KERATIN 8

BABE

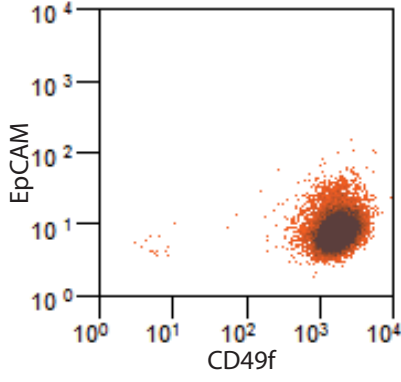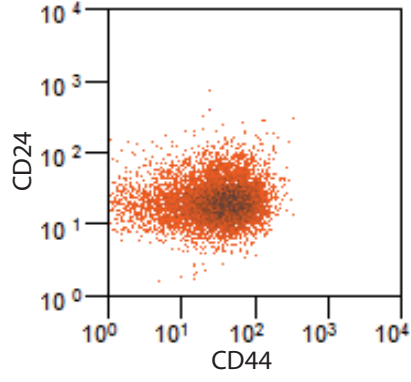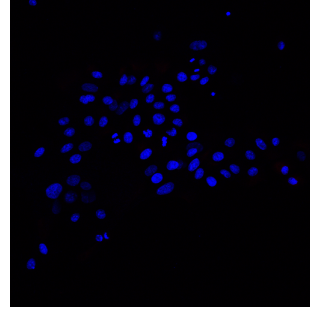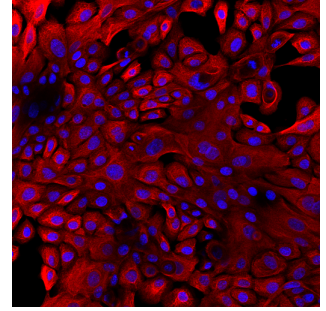

HMLE

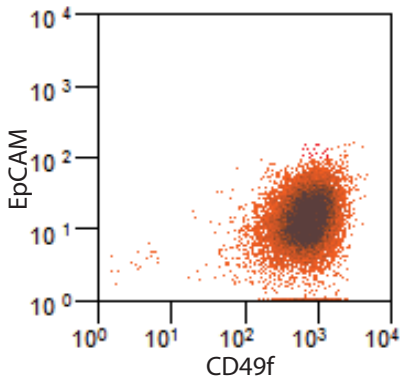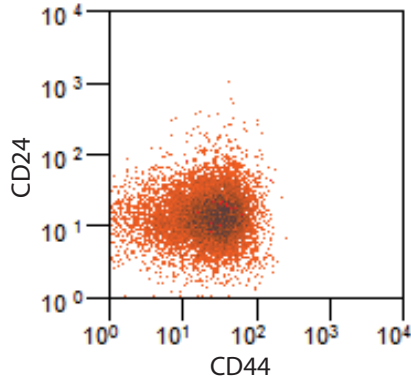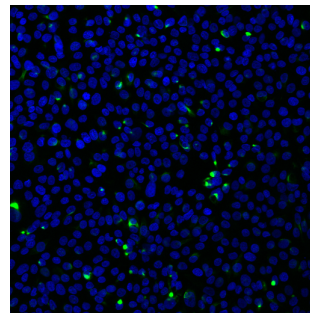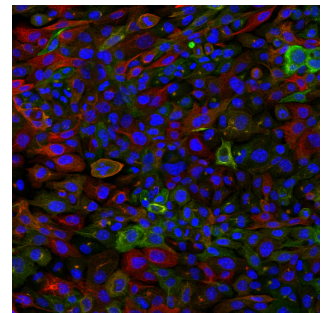

HMLE-SNAIL

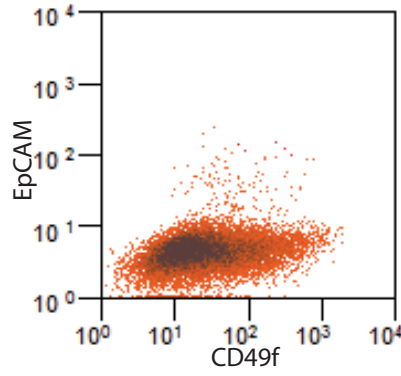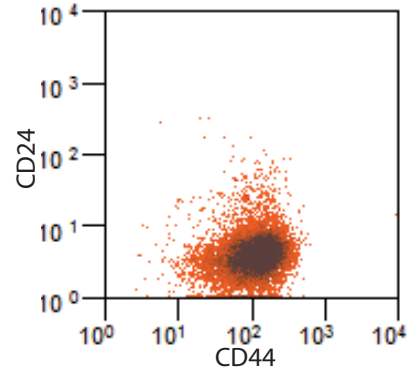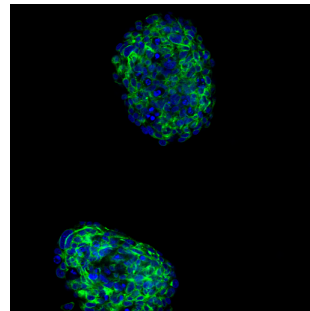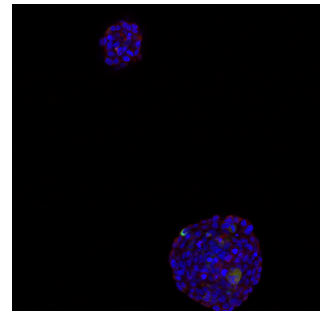

HMLE-TWIST1

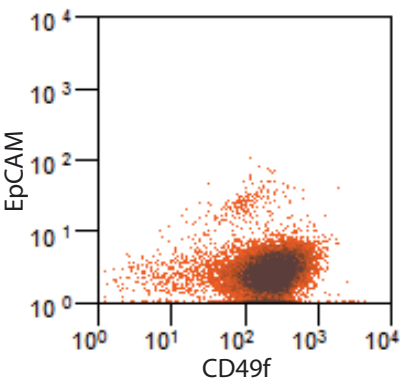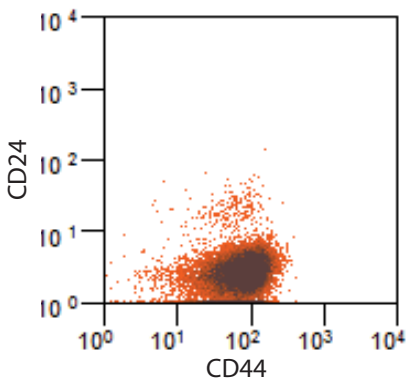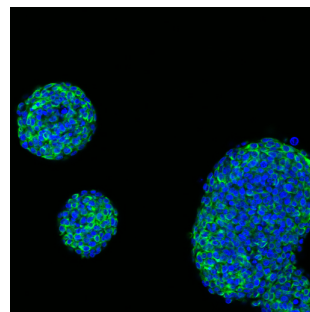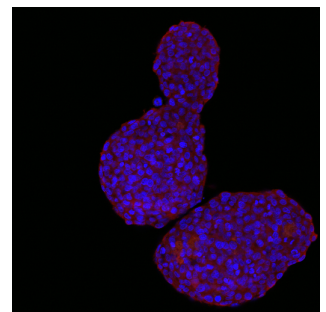

EpCAM/CD49f

CD24/CD44

VIMENTIN

KERATIN 5/KERATIN 8

HCC1428

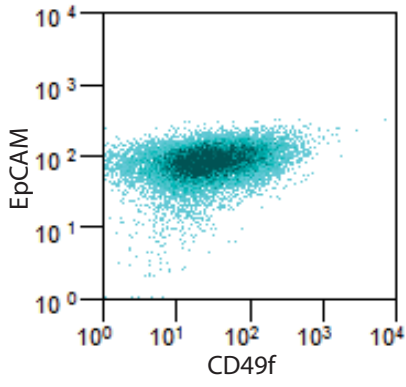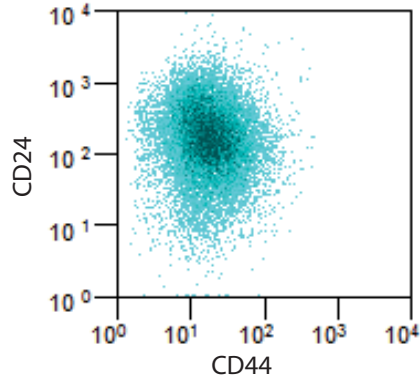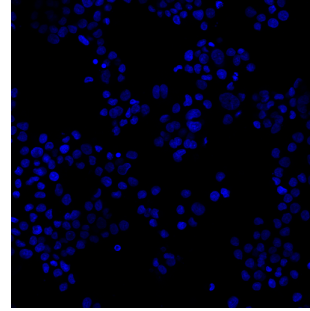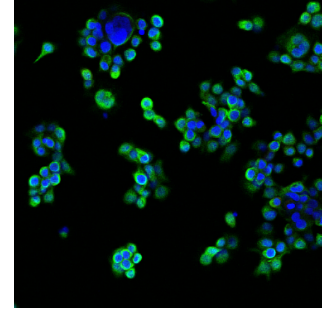

BT474

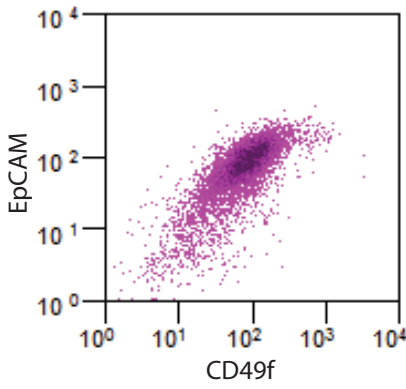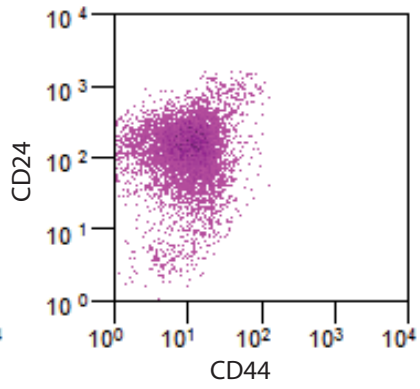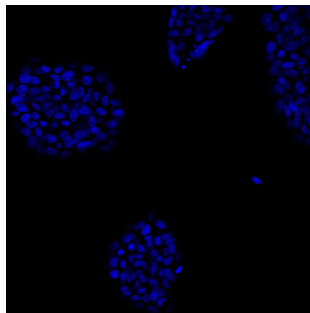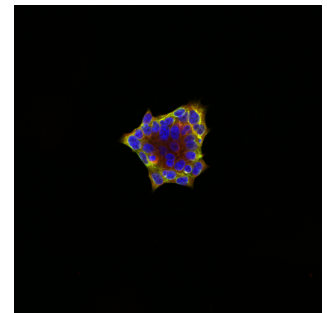

SKBR3

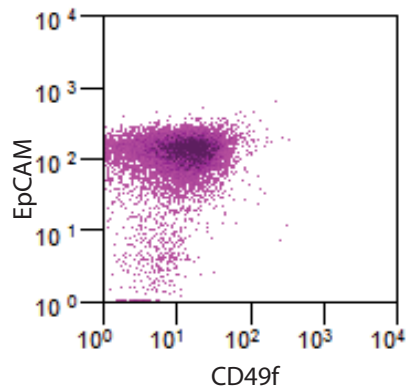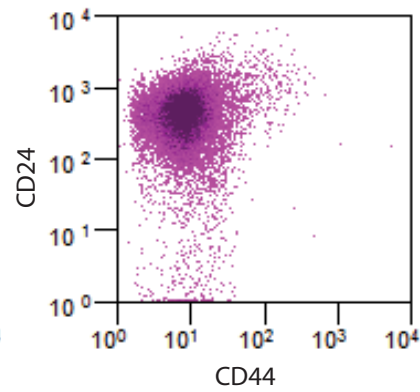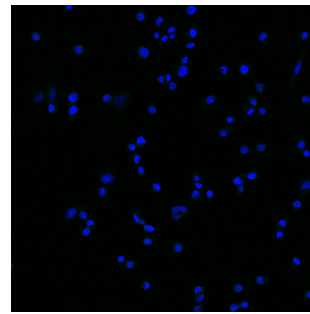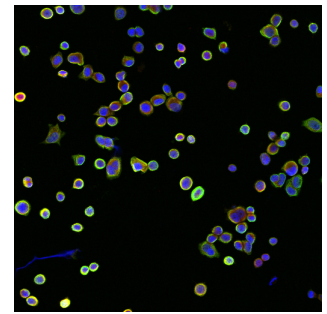

HMF1

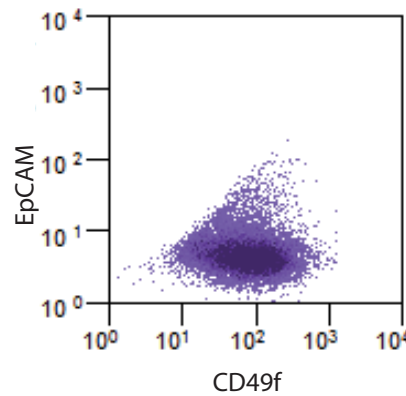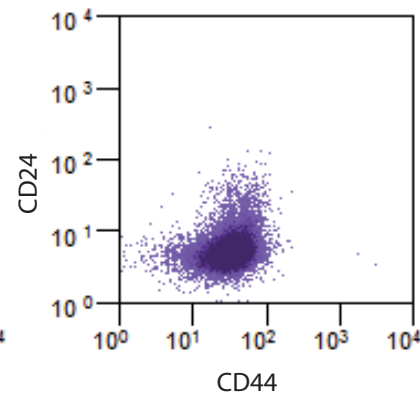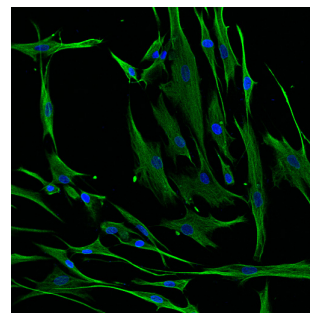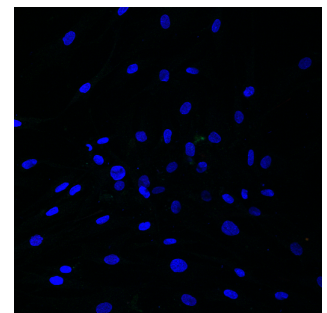



EpCAM/CD49f

CD24/CD44

VIMENTIN

KERATIN 5/KERATIN 8

HCC1500

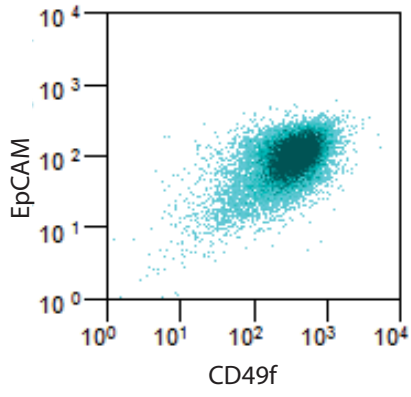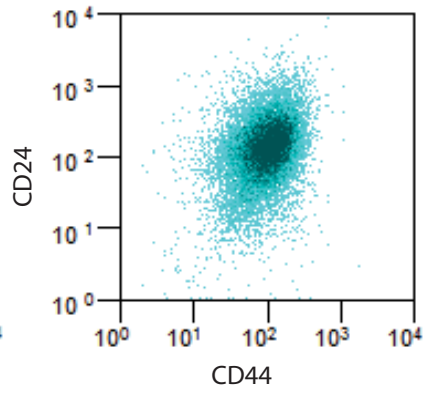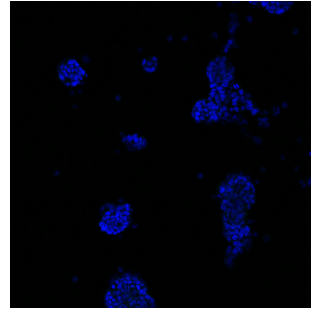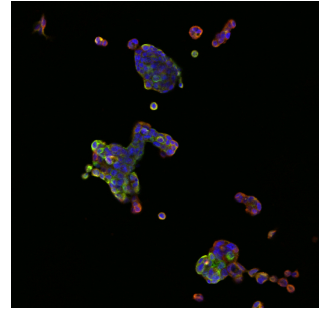

MCF7

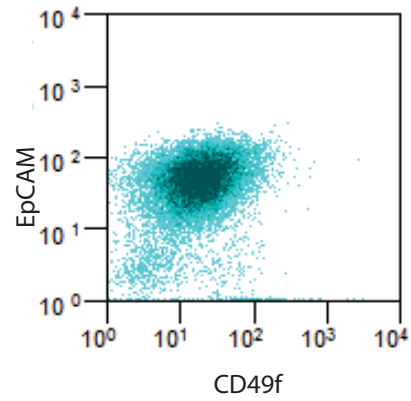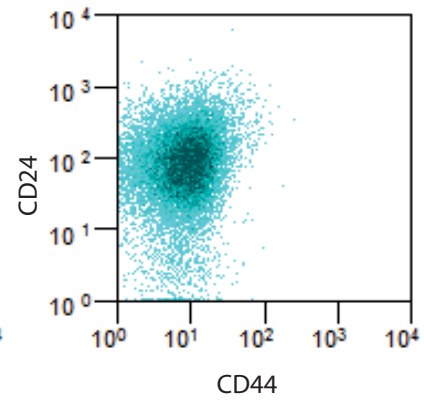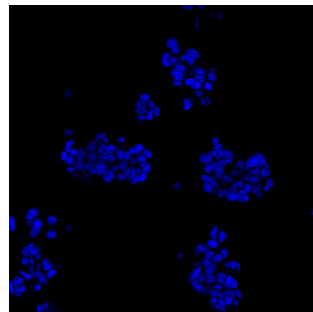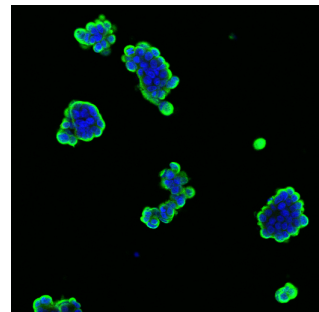

T47D

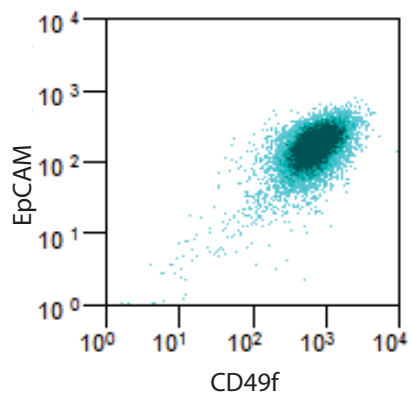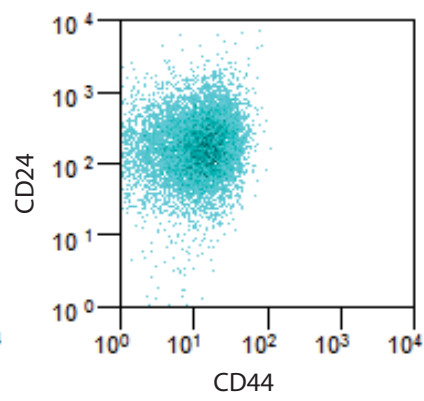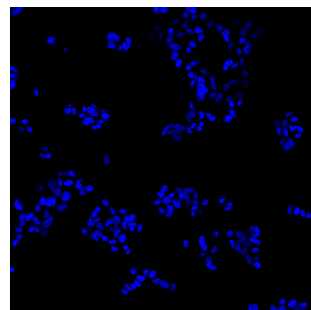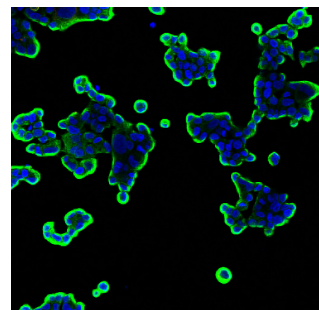

ZR75-1

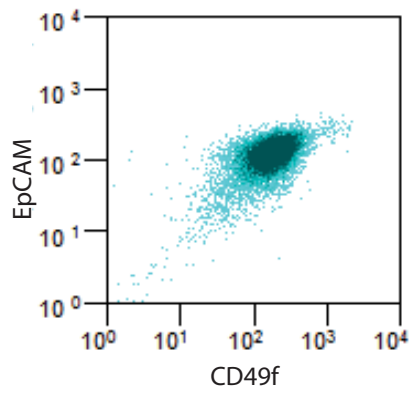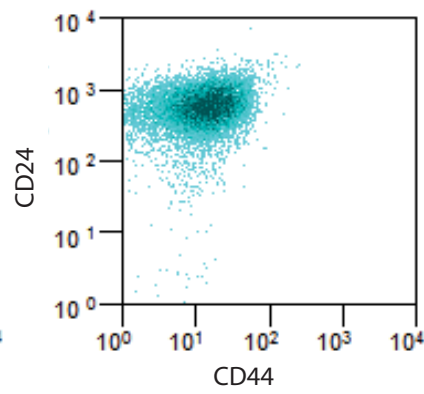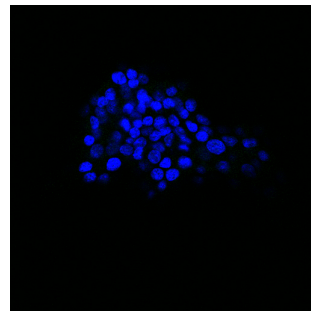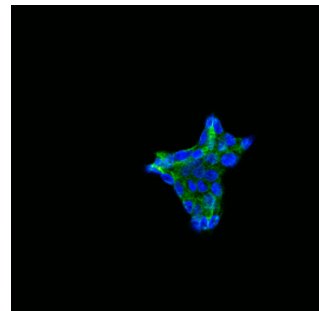



EpCAM/CD49f

CD24/CD44

VIMENTIN

KERATIN 5/KERATIN 8

hMSC#1

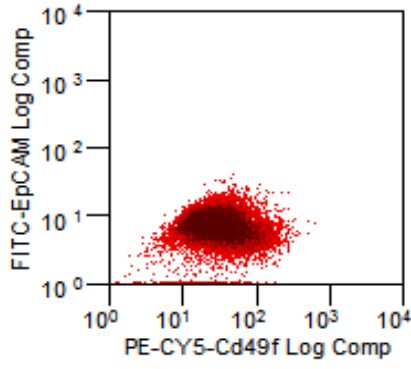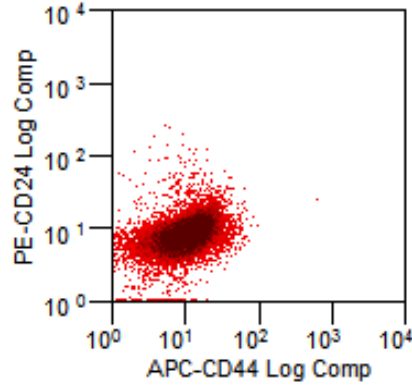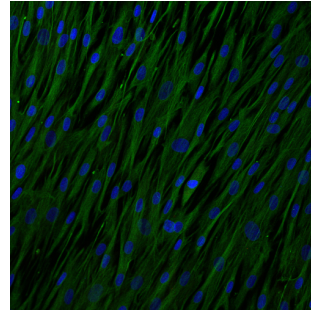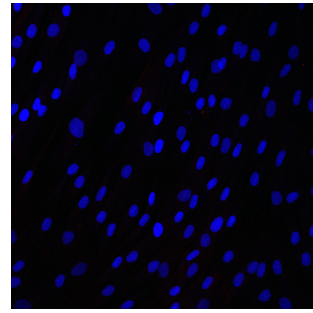

hMSC#2

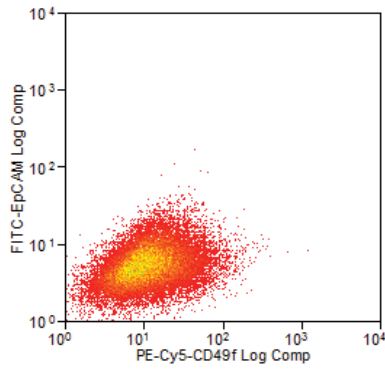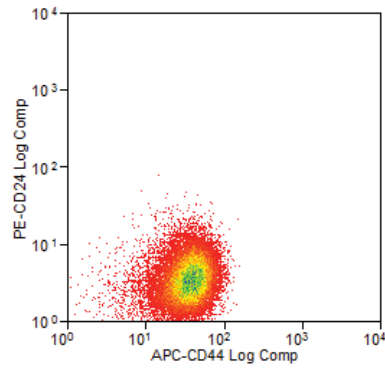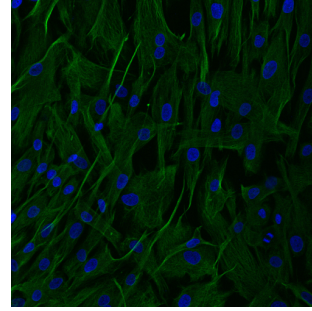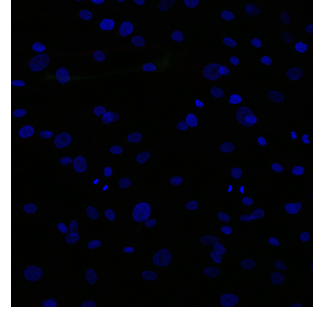

hMSC#3

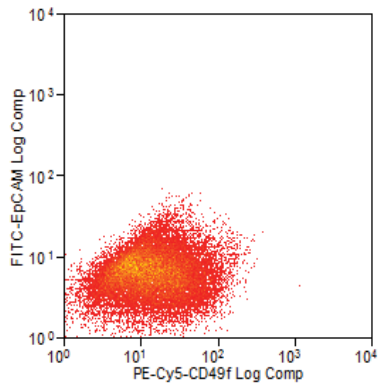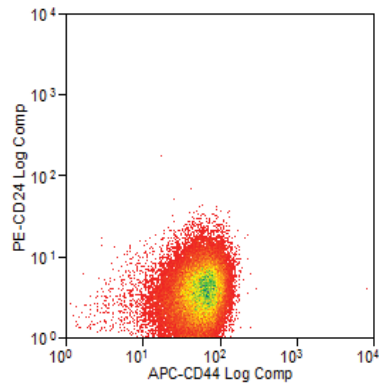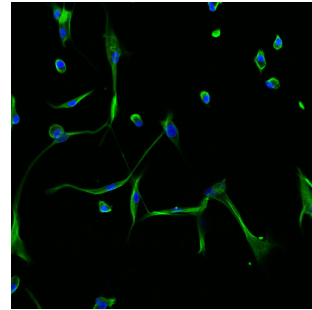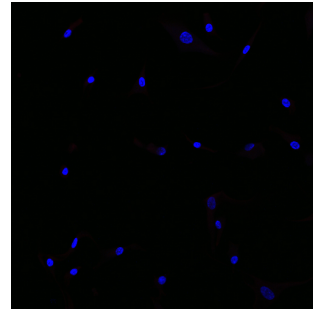

EpCAM/CD49f

CD24/CD44

VIMENTIN

KERATIN 5/KERATIN 8

hESC H9

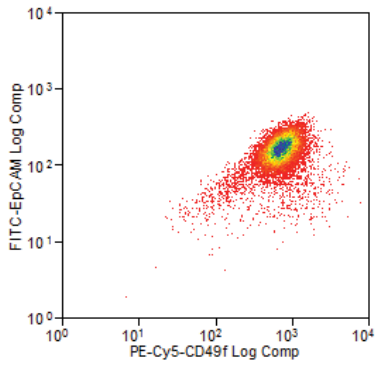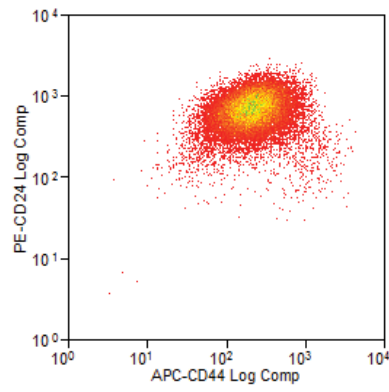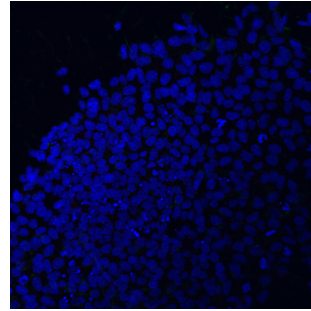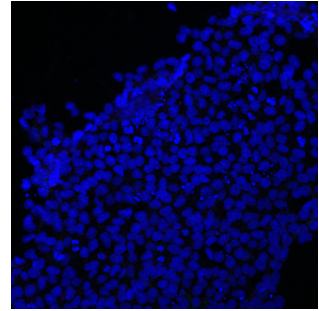

hESC H7

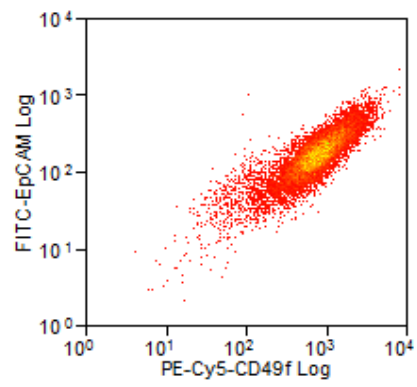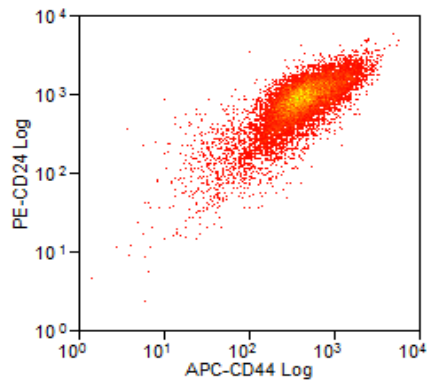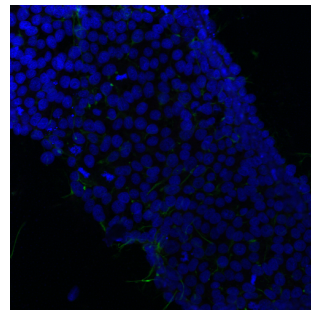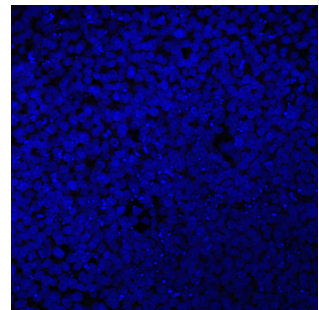

Supplemental Figure 8

**Keratin5/Keratin8**

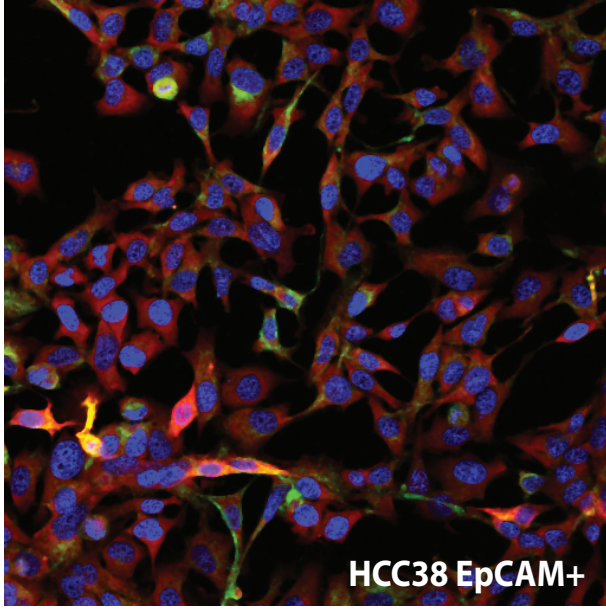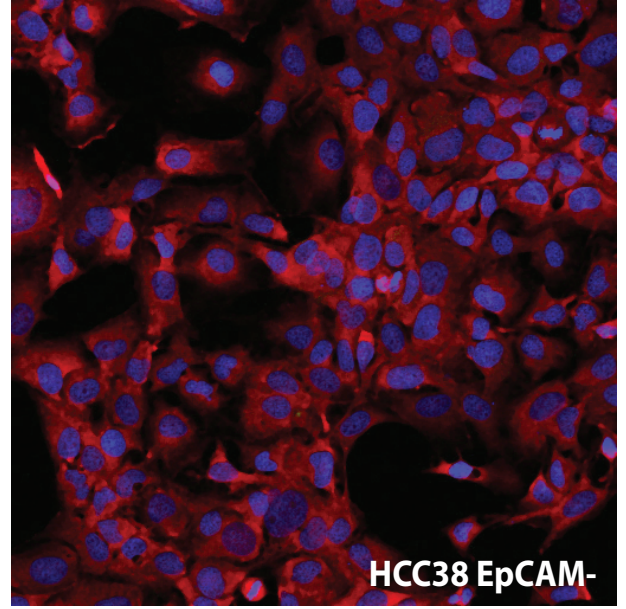

**Vimentin**

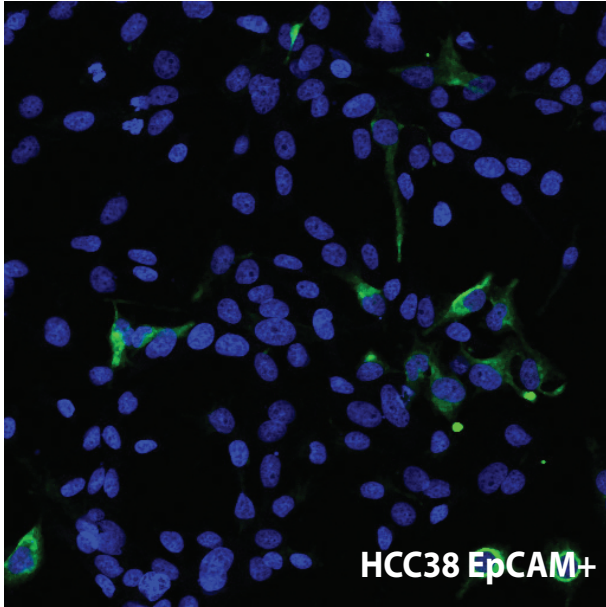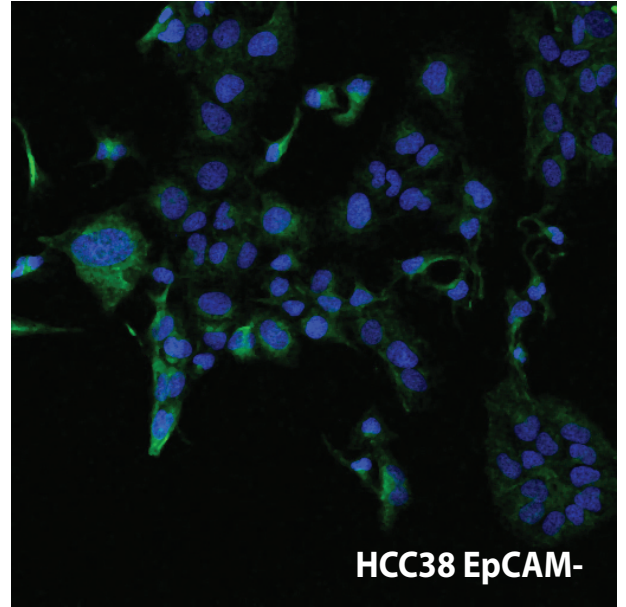



# Supplemental Figure 9

**Keratin5/Keratin8**

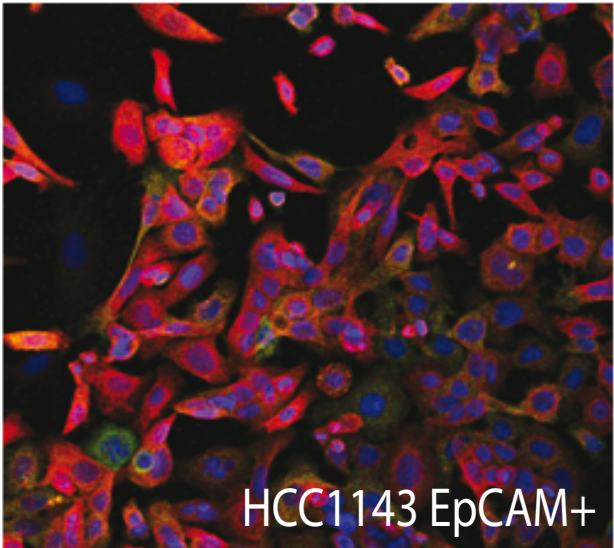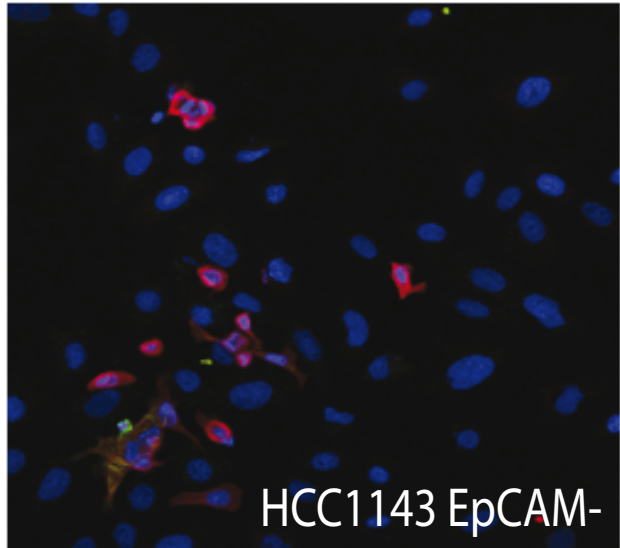

**Vimentin**

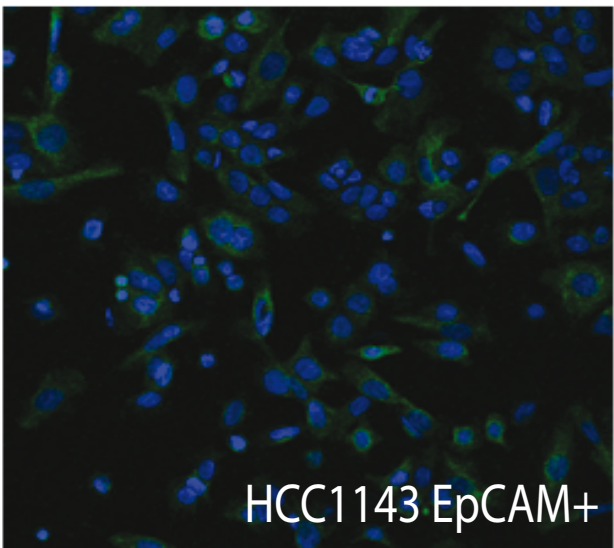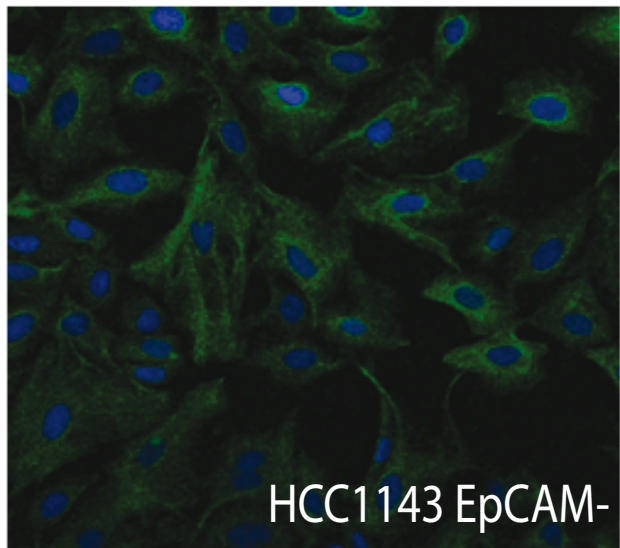

# Supplemental Figure 10

Stromal

MaSC/BiP

pL

mL

Keratin 5/Keratin 8

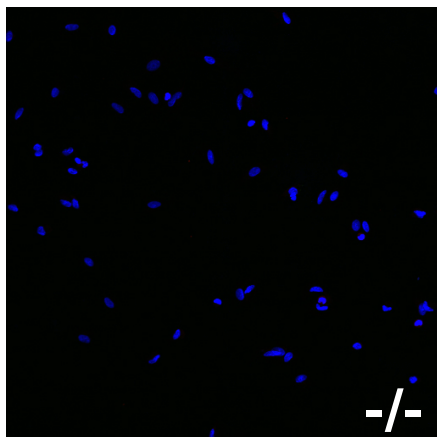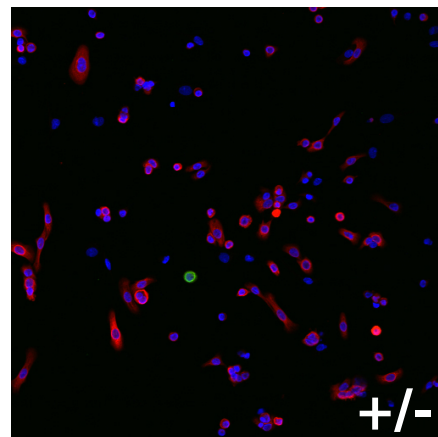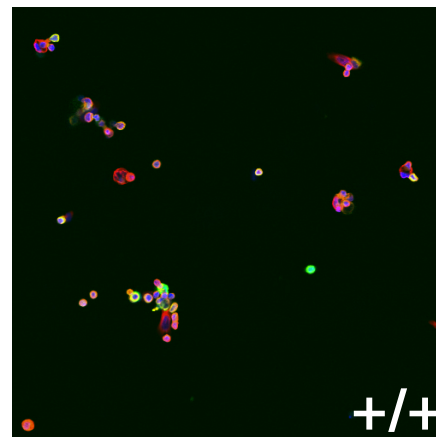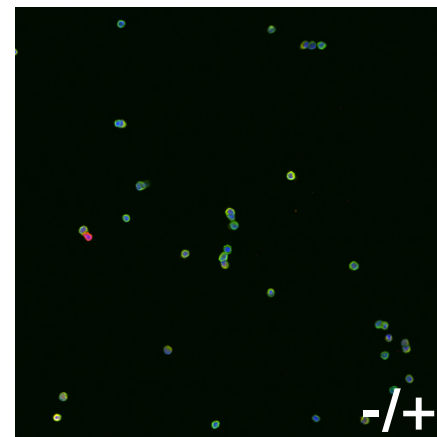

Keratin 5/Vimentin

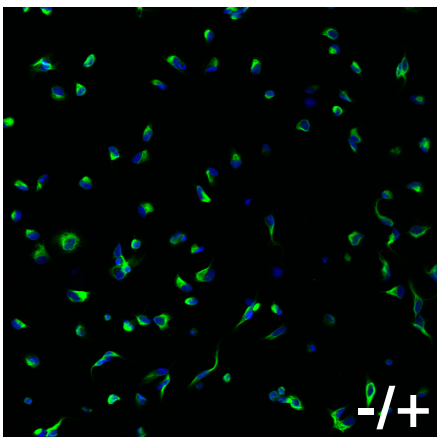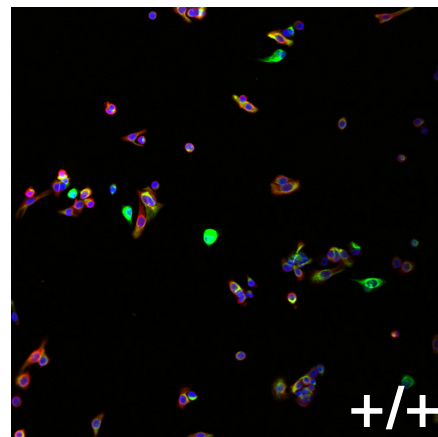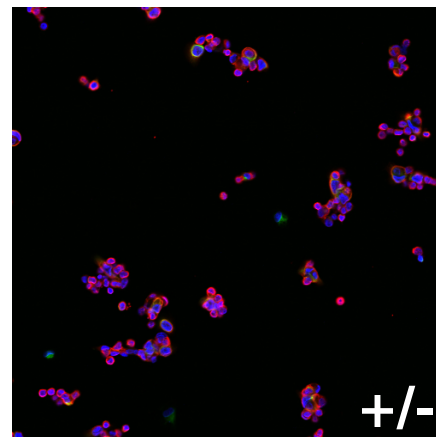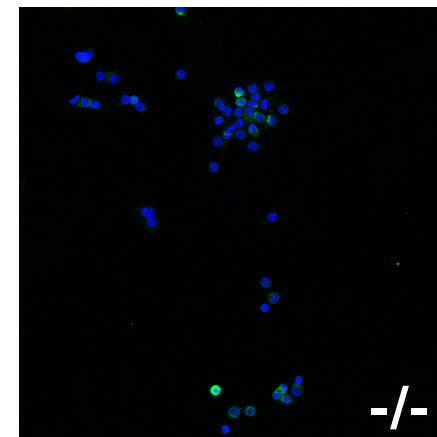

# Supplemental Figure 11

**SUM149**  
**CD49F\_HIGH**

**SUM149**  
**EPCAM\_LOW**

**KERATIN5**

**KERATIN8**

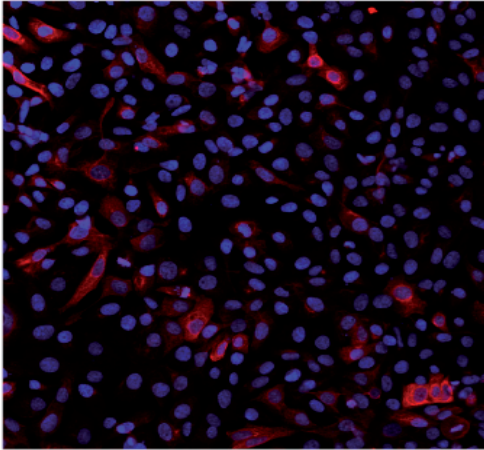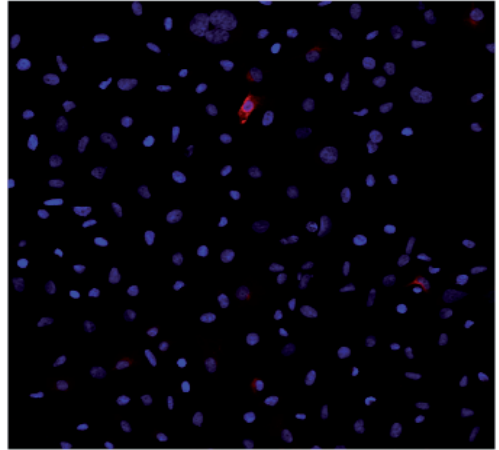

**KERATIN5**

**VIMENTIN**

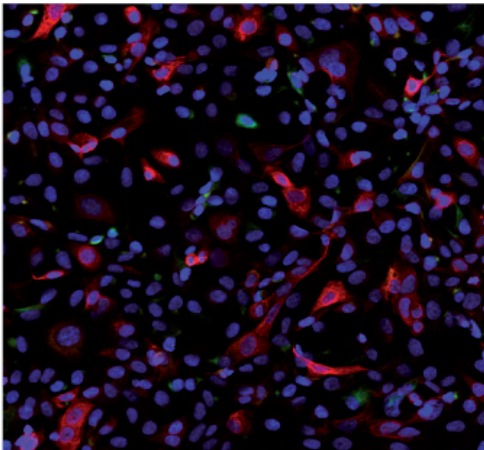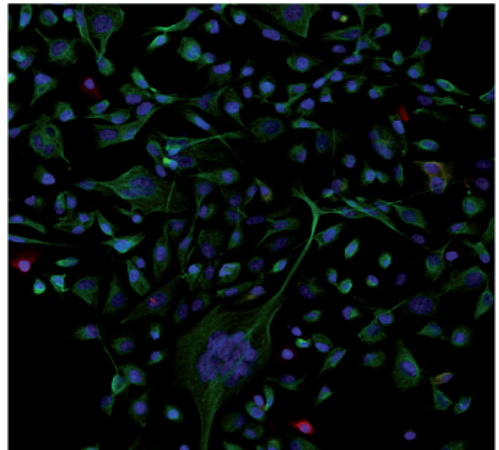

Supplement: MOESM1 [file 8845792]
